29 **Abstract:**

30 *Clostridioides (Clostridium) difficile* is a major cause of hospital-acquired infections leading  
31 to antibiotic-associated diarrhea. *C. difficile* exhibits a very high level of resistance to lysozyme.  
32 Bacteria commonly resist lysozyme through modification of the cell wall. In *C. difficile*  $\sigma^V$  is  
33 required for lysozyme resistance and  $\sigma^V$  is activated in response to lysozyme. Once activated  $\sigma^V$ ,  
34 encoded by *csfV*, directs transcription of genes necessary for lysozyme resistance. Here we  
35 analyze the contribution of individual genes in the *csfV* regulon to lysozyme resistance. Using  
36 CRISPR-Cas9 mediated mutagenesis we constructed in-frame deletions of single genes in the  
37 *csfV* operon. We find *pdaV*, which encodes a peptidoglycan deacetylase, is partially responsible  
38 for lysozyme resistance. We then performed CRISPR inhibition (CRISPRi) to identify a second  
39 peptidoglycan deacetylase, *pgdA*, that is important for lysozyme resistance. Deletion of either  
40 *pgdA* or *pdaV* resulted in modest decreases in lysozyme resistance. However, deletion of both  
41 *pgdA* and *pdaV* resulted in a 1000-fold decrease in lysozyme resistance. Further, mucopeptide  
42 analysis revealed loss of either PgdA or PdaV had modest effects on peptidoglycan deacetylation  
43 but loss of both PgdA and PdaV resulted in almost complete loss of peptidoglycan deacetylation.  
44 This suggests that PgdA and PdaV are redundant peptidoglycan deacetylases. We also use  
45 CRISPRi to compare other lysozyme resistance mechanisms and conclude that peptidoglycan  
46 deacetylation is the major mechanism of lysozyme resistance in *C. difficile*.

47

48 **Importance:**

49 *Clostridioides difficile* is the leading cause of hospital-acquired diarrhea. *C. difficile* is  
50 highly resistant to lysozyme. We previously showed that the *csfV* operon is required for lysozyme  
51 resistance. Here we use CRISPR-Cas9 mediated mutagenesis and CRISPRi knockdown to show  
52 that peptidoglycan deacetylation is necessary for lysozyme resistance and is the major lysozyme  
53 resistance mechanism in *C. difficile*. We show that two peptidoglycan deacetylases in *C. difficile*  
54 are partially redundant and are required for lysozyme resistance. PgdA provides an intrinsic level

55 of deacetylation and PdaV, encoded as part of the *csfV* operon, provides lysozyme-induced  
56 peptidoglycan deacetylation.

57

## 58 Introduction:

59 *Clostridioides difficile* is a Gram-positive, anaerobic, opportunistic pathogen. *C. difficile*  
60 infections are the most common cause of hospital-acquired diarrhea worldwide, with disease  
61 severity ranging from mild diarrhea to severe cases of pseudomembranous colitis (1, 2). *C. difficile*  
62 infections commonly affect patients whose normal gut microbiota has been perturbed by antibiotic  
63 treatment. Disease is primarily mediated through two exotoxins, TcdA and TcdB (3, 4). Both toxins  
64 are glucosyltransferases that glucosylate Rho family GTPases, leading to cytoskeletal defects in  
65 the cell and collapse of tight junctions, which in turn leads to inflammation and cell death of colonic  
66 epithelial cells, ultimately resulting in gastrointestinal distress (5, 6).

67 The bacterial cell wall provides the structure and protection needed for survival in the host  
68 environment. In *C. difficile*, the cell envelope is composed of a thick layer of peptidoglycan, a  
69 crystalline S-layer, and multiple polysaccharides attached to the cell wall (PS-II and PS-III) (7–  
70 10). Presumably to cause an infection *C. difficile* must survive the host immune factors present in  
71 the colon and elevated during the inflammatory response. One abundant host defense factor is  
72 lysozyme, a component of the innate immune system that cleaves the  $\beta$ -1,4-glycosidic linkage  
73 between the GlcNAc and MurNAc residues in the peptidoglycan backbone leading to lysis and  
74 cell death (11, 12). *C. difficile* peptidoglycan has unusual features including a high level of GlcNAc  
75 *N*-deacetylation and an abundance of 3-3 peptide cross-links (13). Deacetylation of peptidoglycan  
76 is a common lysozyme resistance mechanism in a wide variety of bacteria (14).

77 *C. difficile* senses and responds to lysozyme via the ECF  $\sigma^V$  factor (15, 16).  $\sigma^V$  homologs  
78 are also found in multiple other Firmicutes including *Bacillus subtilis* and *Enterococcus faecalis*  
79 (17–19). The activity of  $\sigma^V$  is inhibited by RsiV, a membrane bound anti- $\sigma$  factor. In *B. subtilis* and  
80 *E. faecalis*, RsiV is degraded in the presence of lysozyme (20, 21). In *C. difficile*,  $\sigma^V$  is encoded  
81 by *csfV*, which is found in a 7-gene operon (Fig. S1). The  $\sigma^V$  operon also encodes *pdaV*, a  
82 peptidoglycan deacetylase and *lbpA* (*cdr20291\_1409*), an *rsiV* ortholog containing a putative  
83 lysozyme-binding domain (15).

84           In order to survive and cause infection, many bacteria modify their cell wall components  
85 to resist lysozyme and other cell wall stressors. One mechanism used by multiple organisms  
86 including *C. difficile* is alteration of the net charge of the cell envelope through D-alanyl  
87 esterification (22–24). A second common resistance mechanism is direct inhibition of lysozyme  
88 via lysozyme inhibitor proteins (25–28). The *C. difficile*  $\sigma^V$  regulon includes two putative lysozyme  
89 inhibitor proteins (RsiV and LbpA) and the *dltABCD* operon which is responsible for D-alanyl  
90 esterification (15, 24). Lastly, many bacteria modify their peptidoglycan backbone to prevent  
91 lysozyme from accessing the  $\beta$ -1,4-glycosidic linkage (29, 30).

92           The peptidoglycan backbone can be modified in four ways including acetylation and  
93 deacetylation of both the GlcNAc or MurNAc residues (29). *B. subtilis*, *E. faecalis*, *Staphylococcus*  
94 *aureus* and *Neisseria gonorrhoeae* resist killing by lysozyme through addition of an acetyl group  
95 at the C-6 position of the MurNAc residue, by an O-acetyltransferase frequently encoded by *oatA*  
96 (14, 29, 31). *Lactobacillus plantarum* has been shown to have an O-acetyltransferase that  
97 modifies the GlcNAc residue (32). Alternatively, other organisms including *B. cereus*, *B. anthracis*,  
98 *E. faecalis* and *Streptococcus pneumoniae* utilize polysaccharide deacetylases to remove the N-  
99 acetyl group on the GlcNAc residue at the C-2 position (14, 29). In *B. subtilis* PdaC has been  
100 shown to remove the acetyl group on the MurNAc residue (33). The  $\sigma^V$  regulon in *C. difficile* and  
101 *E. faecalis* contains a polysaccharide deacetylase (*pdaV* and *pgdA*, respectively) that  
102 deacetylates the GlcNAc residues (15, 34). In *B. subtilis* the  $\sigma^V$  operon includes *oatA* leading to O-  
103 acetylation (19).

104           Previously, we reported that  $\sigma^V$  is required for lysozyme resistance in *C. difficile* and this  
105 was partially mediated by deacetylation of peptidoglycan (15). Here we report that the high level  
106 of lysozyme resistance and peptidoglycan deacetylation in *C. difficile* is mediated in large part by  
107 two peptidoglycan deacetylases, PdaV and PgdA. PgdA provides intrinsic basal deacetylation  
108 while PdaV is induced in response to lysozyme, increasing the overall level of deacetylation.

109

110 **Results:**

111  **$\sigma^V$  is required for expression of the *csfV* operon**

112  $\sigma^V$ , encoded by *csfV* (*sigV*), in *C. difficile* is necessary for lysozyme resistance (15).  
113 Previous studies of *csfV* were performed in a *C. difficile* CD630 derivative, JIR8094, and used a  
114 Targetron insertion in *csfV* which is polar on downstream genes (15). Because Targetron  
115 mutagenesis does not allow dissecting the role of individual genes, we sought to use CRISPR-  
116 Cas9 mutagenesis to construct in frame deletions of genes within the *csfV* operon to determine  
117 their contributions to lysozyme resistance. Since  $\sigma^V$  is required for its own expression, disruption  
118 of *csfV* blocked expression of the entire operon (15, 35, 36). To confirm that  $\sigma^V$  is required for  
119 expression of the *csfV* operon in *C. difficile* strain R20291, we used CRISPR-Cas9 mediated  
120 mutagenesis to construct an in-frame deletion of *csfV* (37). To monitor  $\sigma^V$  activity, we used a  
121  $P_{pdaV}::rfp$  reporter plasmid to measure activation of the *csfV* operon in response to lysozyme (35).  
122 Cultures were grown to mid-log phase, then incubated with lysozyme to induce expression of  
123  $P_{pdaV}$ . In the wildtype strain, we observed a lysozyme-dependent increase in fluorescence  
124 indicating increased expression of the  $P_{pdaV}::rfp$  reporter (Fig. 1). Consistent with previous studies,  
125 lysozyme did not induce  $P_{pdaV}::rfp$  expression in the  $\Delta csfV$  mutant (Fig. 1). In fact, basal levels of  
126  $P_{pdaV}::rfp$  expression were significantly (~80-fold) lower in the  $\Delta csfV$  mutant, indicating that  $\sigma^V$  is  
127 required for expression of the *csfV* operon and there is a high basal level expression of the *csfV*  
128 operon (15, 35).

129

130 **Activation of  $\sigma^V$  increases lysozyme resistance**

131 We developed a liquid culture, 96-well format MIC assay for measuring *C. difficile*  
132 sensitivity to lysozyme. Unfortunately, high concentrations of lysozyme (>1 mg/mL) cause  
133 turbidity in the medium, preventing a direct read of culture growth. Instead, we evaluated growth  
134 by spotting an aliquot on to an agar plate and incubating overnight. Wildtype *C. difficile* is highly

135 resistant to lysozyme with an MIC of 8 mg/ml. We found that the  $\Delta csfV$  mutant was 4-fold more  
136 sensitive to lysozyme than the wildtype (Fig. 2A).

137 This MIC assay tests the ability of *C. difficile* to survive exposure to a specific concentration  
138 of lysozyme. However, during an infection *C. difficile* likely encounters a gradient of lysozyme  
139 concentrations. To reproduce a similar environment, we pre-incubated cultures with a range of  
140 sub-inhibitory concentrations of lysozyme prior to exposing them to high levels of lysozyme in the  
141 MIC assay. We observed that when incubated with sub-inhibitory lysozyme concentrations, the  
142 MIC of wildtype *C. difficile* increases in response to both the concentration and length of exposure  
143 (Fig. 2). We found that exposure of wildtype *C. difficile* to 20  $\mu\text{g/ml}$  of lysozyme, for 3 and 5 hours  
144 increased lysozyme resistance 2- and 4-fold respectively (Fig. 2A). When the concentration of  
145 lysozyme in the pre-incubation step was altered, we saw a dose-dependent increase in the  
146 resistance level of the wildtype strain (Fig. 2B). However, we did not observe a change in the MIC  
147 of the  $\Delta csfV$  mutant with either increased incubation time or increased lysozyme concentrations,  
148 indicating that  $\sigma^V$  is required for inducible lysozyme resistance (Fig. 2). We found that pre-  
149 incubation for 5 hours with 20  $\mu\text{g/ml}$  lysozyme led to maximum lysozyme resistance in a wildtype  
150 with an MIC of 32 mg/ml, which was 16-fold higher than the  $\Delta csfV$  mutant MIC of 2 mg/ml (Fig.  
151 2). A similar observation was made with the  $\Delta csfV$  operon mutant (Fig. S2A).

152

### 153 **PdaV and PgdA are redundant**

154  $\sigma^V$  is required for transcription of genes necessary for lysozyme resistance (15). We  
155 sought to dissect the contribution of individual genes to lysozyme resistance. Lysozyme  
156 resistance levels were determined using the MIC assay described above. When the samples were  
157 grown without pretreatment, we found that when either *csfV* alone or the full *csfV* operon is  
158 deleted, the mutant *C. difficile* is 8-fold more sensitive to lysozyme than the wildtype strain (Fig.  
159 3A).

160           When *pdaV*, a peptidoglycan deacetylase, is deleted we see a 2-fold reduction in  
161 lysozyme sensitivity (Fig. 3A). Additionally, we found that when the  $\Delta pdaV$  mutant was  
162 complemented with *pdaV* on a plasmid, lysozyme resistance was restored to levels at or above  
163 the wildtype MIC (Fig. 3B). Previous work found that peptidoglycan from a *csfV* mutant in JIR8094  
164 remains highly deacetylated (~75%) (15). Thus, we sought to identify what other factors may be  
165 contributing to the high degree of deacetylation. *C. difficile* encodes 7 putative polysaccharide  
166 deacetylases that contain predicted transmembrane domains (13, 38). We used CRISPR  
167 inhibition (CRISPRi) to knockdown expression of each deacetylase individually and screened for  
168 changes in lysozyme sensitivity (39). For each deacetylase gene we constructed two plasmids  
169 with different sgRNAs and as a negative control we included a negative control sgRNA that had  
170 no target in the *C. difficile* genome. We tested the CRISPRi plasmids in a  $\Delta csfV$  operon strain  
171 because we sought to observe differences that are independent of the *csfV* response and it lacked  
172 *pdaV* (Fig. S2B). Six of the genes when targeted by CRISPRi had no effect on lysozyme  
173 resistance (Fig. S2B). However, we identified one putative deacetylase gene, *cdr20291\_1371*,  
174 (hereafter referred to as *pgdA* [peptidoglycan deacetylase]) that when knocked down in the  $\Delta csfV$   
175 operon background resulted in a ~100-fold decrease in the level of lysozyme resistance relative  
176 to the parent strain (Fig. S2B).

177           To confirm the results of the CRISPRi knockdown screen, we constructed an in-frame  
178 deletion of *pgdA*. When only *pgdA* was deleted we observed a modest 2-fold decrease in  
179 lysozyme resistance, similar to the 2-fold decrease observed when *pdaV* is deleted (Fig. 3A).  
180 However, when both *pgdA* and *pdaV* are deleted we observed a ~1000-fold decrease in lysozyme  
181 resistance (Fig. 3A). This data suggests that *pgdA* and *pdaV* are redundant and that either one is  
182 sufficient to confer high level of lysozyme resistance in *C. difficile*. To further support the  
183 redundant phenotype of *pgdA* and *pdaV*, we exogenously expressed *pdaV* in the  $\Delta pgdA \Delta pdaV$   
184 double mutant. We found that exogenous expression of *pdaV* in a  $\Delta pgdA \Delta pdaV$  double mutant



185 restored lysozyme resistance to 2 mg/ml, similar to a  $\Delta pgdA$  mutant (Fig. 3B). We were unable to  
186 complement with *pgdA* as we had difficulty cloning in *E. coli* and continuously obtained frameshift  
187 mutations within *pgdA*.

188 Additionally, we used CRISPRi to knockdown expression of *pgdA* in another *C. difficile*  
189 strain, JIR8094 an erythromycin sensitive derivative of *C. difficile* CD630 (40). When *pgdA* was  
190 knocked down in a wildtype background we observed a ~2-fold reduction in lysozyme resistance  
191 (Fig. S3). When *pgdA* was knocked down in a JIR8094 *csfV*-null strain we observed a ~100-fold  
192 decrease in lysozyme resistance (Fig. S3). This indicates that loss of both PdaV and PgdA results  
193 in a large decrease in lysozyme resistance in multiple *C. difficile* strains.

194 To determine if expression of *pgdA* was lysozyme-inducible, we constructed a  $P_{pgdA}$ -*rfp*  
195 fusion. We then tested the effect of increasing lysozyme concentrations on  $P_{pgdA}$ -*rfp* expression.  
196 We did not observe an increase in  $P_{pgdA}$ -*rfp* expression in response to increasing lysozyme  
197 concentrations suggesting *pgdA* expression is not controlled by lysozyme (Fig. S4). This is  
198 consistent with previous microarray experiments that did not show altered expression of *pgdA* by  
199 lysozyme (15).

200

## 201 **PdaV and PgdA are the major peptidoglycan deacetylases in *C. difficile***

202 Next, we sought to identify the acetylation state of peptidoglycan from strains lacking one  
203 or both of the deacetylases contributing to lysozyme resistance. We purified peptidoglycan from  
204 wildtype,  $\Delta pgdA$ ,  $\Delta pdaV$ , and  $\Delta pgdA \Delta pdaV$  strains. Peptidoglycan was digested with  
205 mutanolysin, and muropeptides were separated by charge using reversed-phase HPLC (Fig. 4A).  
206 Muropeptide structures were either previously determined or were newly determined using mass  
207 spectrometry (15). The peptidoglycan purified from wildtype strain R20291 was made up of  
208 muropeptides containing mostly glucosamine (i.e. deacetylated) rather than N-acetyl-  
209 glucosamine residues (Fig. 4B and Table 1). Analysis of the peptidoglycan from the  $\Delta pdaV$  mutant

210 revealed the level of deacetylation remained relatively unchanged compared to the wildtype strain  
211 (Fig. 4B and Table 1). When *pgdA* was deleted, we observed decreases in the muuropeptides  
212 containing glucosamine residues corresponding with an increase in muuropeptides containing  
213 GlcNAc residues (Fig. 4B and Table 1). In the  $\Delta pgdA \Delta pdaV$  mutant we saw a drastic increase in  
214 the amount of GlcNAc residues and a concomitant decrease in glucosamine residues, with the  
215 overall percentage of muuropeptides containing GlcNAc increasing ~15-fold relative to the wildtype  
216 strain. For example, we saw in the double mutant the deacetylated tri-gly muuropeptides (peak 4)  
217 are almost completely absent, concomitant with an increase in acetylated tri-gly muuropeptides  
218 (peak 3) (Table 1). This suggests that both PdaV and PgdA are major peptidoglycan deacetylases  
219 in *C. difficile*.

220

#### 221 **RsiV and LbpA act as inhibitors of lysozyme**

222 In *B. subtilis*, RsiV binding to lysozyme leads to  $\sigma^V$  activation (21). In addition to RsiV, the  
223  $\sigma^V$  operon in *C. difficile* encodes for CDR1409 (CD1560 in JIR8094), an RsiV ortholog hereafter  
224 referred to as *lbpA* for lysozyme-binding protein A. LbpA is 58% identical to *C. difficile* RsiV and  
225 contains a putative lysozyme binding domain but lacks the  $\sigma$ -binding domain (Fig. S5). We sought  
226 to determine if RsiV and LbpA contribute to lysozyme resistance via direct inhibition of lysozyme.  
227 To determine if RsiV and LbpA can inhibit lysozyme we performed an *in vitro* lysozyme inhibition  
228 assay. We purified 6xHis-RsiV and 6xHis-LbpA from *E. coli*. Peptidoglycan from *M. lysodeikticus*  
229 was incubated with lysozyme and varying concentrations of RsiV or LbpA. We observed that when  
230 the ratio of RsiV to lysozyme was greater than 1:1, the activity of lysozyme was inhibited, and the  
231 peptidoglycan remained intact (Fig. 5A and Fig. S6). When equimolar ratios of lysozyme and RsiV  
232 were used most of the lysozyme activity was blocked (Fig. 5A and Fig. S6). Similarly, LbpA  
233 inhibited lysozyme activity when used in excess or equimolar ratio to lysozyme (Fig. 5A and Fig.  
234 S6). This suggests that both RsiV and LbpA can bind and inhibit lysozyme activity *in vitro*.

235 To investigate the effect of LbpA on lysozyme resistance we constructed an in-frame  
236 deletion of *lbpA* and tested the effect on the lysozyme MIC. We did not observe any effect on  
237 lysozyme resistance (Fig. S7A). We did not attempt to construct a deletion of *rsiV* since it would  
238 lead to constitutive activation of  $\sigma^V$  and thus would be difficult to dissect the contribution of  
239 lysozyme inhibition versus the effect on  $\sigma^V$  activity. Instead, to further investigate the role of these  
240 putative lysozyme inhibitors we tested the ability of both proteins to alter the resistance level *in*  
241 *vivo* by exogenous expression from the  $P_{xyI}$  promoter. We found that exogenous expression of  
242 *rsiV* or *lbpA* does not alter lysozyme resistance in a  $\Delta csfV$  operon background (Fig. S7B). We  
243 hypothesized that inhibition of lysozyme may contribute to lysozyme resistance only when  
244 lysozyme concentrations are low. Thus, to detect differences, we used our most lysozyme  
245 sensitive strain,  $\Delta pgdA \Delta pdaV$ . We observed that exogenous expression of *rsiV* or *lbpA* increases  
246 lysozyme resistance 4- and 2-fold respectively, relative to the  $\Delta pgdA \Delta pdaV$  parent strain (Fig.  
247 5B). Together these data indicate that both RsiV and LbpA can inhibit lysozyme *in vitro* and confer  
248 resistance to low levels of lysozyme *in vivo*.

249

## 250 **Contribution of other cell wall modification to lysozyme resistance**

251 Several other factors have been implicated in lysozyme resistance in *C. difficile* including  
252 the S-layer and d-alanylation of teichoic acids (10, 36). We sought to compare the contribution of  
253 these other lysozyme resistance mechanisms to the role of peptidoglycan deacetylation. To do  
254 this we used CRISPRi to knockdown expression of the *dltABCD* operon, which alters the charge  
255 of teichoic acids, and expression of *slpA*, which encodes the major S-layer proteins. We found  
256 that when the *dltABCD* operon is knocked down, the MIC decreases ~16-fold from 8 to 0.5 mg/mL  
257 (Fig. S8). Similarly, upon knocking down *slpA* we lower the MIC to ~2 mg/ml, a ~4-fold change  
258 from wildtype (Fig. S8). As a control for CRISPR-silencing versus gene deletion, we also knocked  
259 down the *csfV* operon and observed ~4-8-fold decrease in lysozyme resistance. Thus, knocking

260 down each of these genes results in decreased lysozyme resistance similar to that of the  $\Delta csfV$   
261 mutant. In conclusion, our data suggests that multiple factors contribute to lysozyme resistance.  
262 Nevertheless, deacetylation is the single most important mechanism, where deletion of the two  
263 key deacetylases achieves an MIC shift of ~1000-fold.

264

## 265 **Discussion**

266 Lysozyme is an important component of the innate immune system and one of the first  
267 lines of defense against bacteria. In order to avoid killing by lysozyme, many bacteria modify cell  
268 wall properties including peptidoglycan and cell surface charge. We find *C. difficile* encodes both  
269 an endogenous lysozyme resistance and an inducible lysozyme resistance mechanism. The  
270 inducible lysozyme resistance is primarily mediated by the ECF  $\sigma$  factor  $\sigma^V$ . In response to  
271 lysozyme,  $\sigma^V$  upregulates expression of lysozyme resistance mechanisms including the Dlt  
272 pathway, a peptidoglycan deacetylase (PdaV), and putative lysozyme inhibitor proteins (RsiV and  
273 LbpA) (15, 36). Additionally, a high basal level of peptidoglycan deacetylation and the crystalline  
274 S-layer contribute to lysozyme resistance (10). Here we show that together these modifications  
275 help confer a high level of lysozyme resistance.

276 One common mechanism of lysozyme resistance used by bacteria is modification of the  
277 acetylation state of peptidoglycan to prevent cleavage at the  $\beta$ -(1-4) linkage by lysozyme.  
278 Peptidoglycan modifications include addition or removal of acetyl groups from either the MurNAc  
279 or GlucNAc residues on the peptidoglycan backbone (29, 41). In many pathogens, including *S.*  
280 *aureus* and *L. monocytogenes* O-acetylation is important for resistance to lysozyme and virulence  
281 (42, 43). Multiple organisms, including *C. difficile*, *B. subtilis* and *E. faecalis* modify peptidoglycan  
282 in a  $\sigma^V$  dependent manner in response to lysozyme (15, 18, 19, 31, 44). In *B. subtilis*, the  $\sigma^V$   
283 operon includes an O-acetylase, *oatA* which is responsible for acetylating the MurNAc residues  
284 in peptidoglycan (19, 31). Additionally, the *dlt* operon in *B. subtilis*, responsible for D-alanylation  
285 of teichoic acids, is regulated by  $\sigma^V$  (31, 45). Mutations in either *oatA* or the *dlt* operon results in

286 ~2-fold decrease in lysozyme resistance (19, 31). Similarly, the  $\sigma^V$  regulon in *E. faecalis* includes  
287 *pgdA*, a peptidoglycan deacetylase that contributes to lysozyme resistance (44, 46). *E. faecalis*  
288 also depends on OatA and the Dlt pathway for lysozyme resistance, however these are  $\sigma^V$ -  
289 independent (18, 34, 44).

290 Previous work demonstrated that *C. difficile* peptidoglycan is highly deacetylated (13). We  
291 had shown that deacetylation can be increased in response to lysozyme via increased activity of  
292  $\sigma^V$  which was presumably mediated by PdaV (15). Here, we have identified an additional  
293 peptidoglycan deacetylase, PgdA, that plays a critical role in lysozyme resistance. When both  
294 *pgdA* and *pdaV* are deleted, only a small percentage of the peptidoglycan is deacetylated and the  
295 level of lysozyme resistance is drastically decreased. This suggests that the high level of  
296 deacetylation observed in *C. difficile* is required for lysozyme resistance. Our data indicated either  
297 PgdA or PdaV are sufficient for high levels of lysozyme resistance, with loss of either *pgdA* or  
298 *pdaV* resulting in modest 2-fold decreases in lysozyme resistance. When *pgdA* alone was deleted,  
299 we detected a decrease in total percentage of deacetylated glucosamine residues. Interestingly,  
300 we did not observe a change in total percentage of deacetylated residues in the absence of *pdaV*.  
301 This is likely because the samples were grown in the absence of lysozyme and therefore the  $\sigma^V$   
302 response was not activated. However, it is also clear from this analysis that even in the absence  
303 of lysozyme there is a significant contribution of PdaV to deacetylation likely due to high basal  
304 level expression of *pdaV*. In fact, we observed high basal level expression of the *pdaV* reporter  
305 in a wildtype strain and deletion of *csfV* resulted in a marked decrease in  $P_{pdaV-rfp}$  reporter signal.  
306 Taken together our data suggest that either PdaV or PgdA are sufficient for peptidoglycan  
307 deacetylation and lysozyme resistance in *C. difficile*.

308 We have shown that exposing cultures to sub-inhibitory levels of lysozyme prior to  
309 incubation with high levels of lysozyme allows the cells to increase the lysozyme MIC in a  $\sigma^V$ -  
310 dependent manner. This indicates that the modifications made by the  $\sigma^V$  regulon during exposure  
311 to sub-inhibitory lysozyme permit the bacteria to increase their ability to survive when exposed to

312 high levels of lysozyme. Lysozyme activates the  $\sigma^V$ -mediated modifications including increased  
313 deacetylation and D-alanylation of teichoic acids (36).

314 One of the unique features of the *C. difficile* *csfV* operon is the presence of two proteins,  
315 RsiV and LbpA, which can bind lysozyme. RsiV functions as an anti- $\sigma$  factor and can inhibit  $\sigma^V$   
316 activity (19). In contrast, LbpA lacks the  $\sigma^V$ -binding domain. We find that both RsiV and LbpA  
317 inhibit lysozyme activity *in vitro*. Our data also show that exogenous production of either RsiV or  
318 LbpA in a lysozyme sensitized strain ( $\Delta pgdA \Delta pdaV$ ) increases lysozyme resistance. The ability  
319 of RsiV and LbpA to inhibit lysozyme activity and increase the MIC in a sensitive strain indicate a  
320 possible role for lysozyme inhibitors in *C. difficile*. It is unclear how rapidly the peptidoglycan and  
321 lipoteichoic acids can be modified to increase lysozyme resistance. As a *C. difficile* infection is  
322 established, the toxins elicit an inflammatory response recruiting neutrophils to the site of infection  
323 increasing the concentration of lysozyme. We hypothesize that the lysozyme inhibitors may be  
324 important early in infection to sequester lysozyme allowing the cell additional time for surface  
325 modifications such as increased deacetylation.

326

## 327 **Materials and Methods:**

328 **Bacterial strains, media and growth conditions.** Bacterial strains are listed in Table 2. *C.*  
329 *difficile* strains used in this study are derivatives of R20291. *C. difficile* was grown in or on  
330 tryptone-yeast (TY) medium supplemented as needed with thiamphenicol at 10  $\mu\text{g/ml}$  (Thi<sub>10</sub>),  
331 kanamycin at 50  $\mu\text{g/ml}$ , or cefoxitin at 50  $\mu\text{g/ml}$ . TY consisted of 3% tryptone, 2% yeast extract  
332 and 2% agar (for solid medium). *C. difficile* strains were maintained at 37°C in an anaerobic  
333 chamber (Coy Laboratory products) in an atmosphere of 10% H<sub>2</sub>, 5% CO<sub>2</sub>, and 85% N<sub>2</sub>.

334 *E. coli* strains were grown in LB medium at 37°C with chloramphenicol at 10  $\mu\text{g/ml}$  and  
335 ampicillin at 100  $\mu\text{g/ml}$  as needed. LB contained 1% tryptone, 0.5% yeast extract, 0.5% NaCl and  
336 1.5% agar (for solid medium).

337

338 **Plasmid and bacterial strain construction.** All plasmids are listed in Table 3 and Table S1.

339 Plasmids were constructed using Gibson Assembly (New England Biolabs, Ipswich, MA). Regions

340 of plasmids constructed using PCR were verified by DNA sequencing. Oligonucleotide primers

341 used in this work were synthesized by Integrated DNA Technologies (Coralville, IA) and are listed

342 in Table S2. All plasmids were propagated using OmniMax-2 T1R as a cloning host. CRISPR-

343 Cas9 deletion plasmids were passaged through *E. coli* strain MG1655, before transformation into

344 *B. subtilis* strain BS49. The CRISPR-Cas9 deletion plasmids which harbor the *oriT*<sub>(Tn916)</sub> origin of

345 transfer, were then introduced into *C. difficile* strains by conjugation (37). All other plasmids (RP4

346 *oriT traJ* origin of transfer) were transformed into *E. coli* strain HB101/pRK24, then introduced into

347 *C. difficile* by conjugation (47).

348 CRISPR-Cas9 plasmids were built on the backbone of pJK02 (37). Initial constructs

349 expressed *cas9* under  $P_{tet}$  control. The final construct, pCE641, placed *cas9* under  $P_{xyl}$  control.

350 The  $P_{tet}$  regulatory element was removed from pJK02 by digestion with *PacI* and *XhoI* and

351 replaced with a *xyIR-P<sub>xyl</sub>* fragment amplified by PCR of R20291 chromosomal DNA. Donor regions

352 for homology were made by separately amplifying regions ~500 bp upstream and ~500 bp

353 downstream of the gene of interest. The resulting regions were cloned into the *NotI* and *XhoI*

354 restriction sites in pCE641 by Gibson Assembly. The algorithm provided by Benchling was used

355 to design sgRNAs targeting each deleted gene (48). Guide parameters were set to default

356 conditions to identify a 20-nucleotide guide with the PAM set to NGG. sgRNA fragments were

357 amplified by PCR from pCE641, using an upstream primer that introduces the altered guide and

358 inserted at the *KpnI* and *MluI* sites of the pCE641-derivative with the appropriate homology region.

359 For CRISPRi constructs, the algorithm provided by Benchling was used to design sgRNAs

360 as described above. Final candidates were selected to be high scoring and bind to the non-coding

361 strand in the first third of the gene sequence. The sequences for sgRNAs are summarized in

362 Table S3. sgRNA fragments were amplified by PCR from pIA33, using an upstream primer that  
363 introduces the altered guide and inserted at the MscI and NotI sites of the pIA33 (39).

364

365 **Peptidoglycan purification.** Peptidoglycan was purified from 100 ml cultures grown to an OD<sub>600</sub>  
366 of 0.6 to 0.8 in TY broth. Peptidoglycan was purified as previously described (Ho 2014). Briefly,  
367 cells were pelleted by centrifugation and supernatant was discarded. The cells were boiled in 4%  
368 sodium dodecyl sulfate (SDS) for 1 hr. Samples were pelleted and supernatant was discarded.  
369 Samples were washed in sterile water 6 times to remove SDS. Samples were digested with  
370 DNaseI (NEB) and RNase (Sigma-Aldrich) for 2 hrs at 37°C to remove nucleotides and then  
371 digested with Trypsin (Sigma-Aldrich) for 16 hrs at 37°C. Teichoic acids were removed by  
372 resuspending the samples in 1 ml 49% hydrofluoric acid (VWR) rocking for 48 hrs 4°C. Samples  
373 were subsequently washed extensively in sterile water. The peptidoglycan was digested for 16  
374 hrs with 125 units Mutanolysin (Sigma-Aldrich) as previously described (49). Muropeptides were  
375 separated and purified using HPLC and analyzed by MALDI-TOF MS as previously described  
376 (15).

377

378 **Protein expression and purification.** Cultures of *E. coli* BL21λDE3 Rosetta containing an  
379 expression plasmid for either RsiV or LbpA were diluted 1:100 in 100 ml LB supplemented with  
380 10 µg/ml chloramphenicol and 100 µg/ml ampicillin. Samples were grown at 30°C to an OD<sub>600</sub> of  
381 0.6 then induced with 1mM IPTG and grown for an additional 4 hrs at 30°C. Cells were chilled on  
382 ice and pelleted by centrifugation at 2500 x g. Cell pellets were stored at -80°C until time for  
383 purification. Cells were thawed on ice in 2 ml lysis buffer (50 mM Tris HCl 250 mM NaCl, 10 mM  
384 imidazole, 3 mM Triton X-100 pH 8.0). Cells were lysed by sonication and lysate was centrifuged  
385 at 17,000 x g to pellet cell debris. Clarified lysate was added to 500 µl nickel resin slurry (Thermo)  
386 and incubated rocking at 4°C for 30 minutes to bind 6xHis-tagged protein. The resin was washed



387 five times with 2 ml wash buffer (50 mM Tris-HCl, 250 mM NaCl, 20 mM imidazole, 0.3 mM Triton  
388 X-100 pH 8.0). To elute protein, resin was incubated with 500  $\mu$ l elution buffer (50 mM Tris-HCl,  
389 250 mM NaCl, 250 mM imidazole, 0.03 mM Triton X-100 pH 8.0) rocking at 4°C for 15 minutes.  
390 Samples were centrifuged, and supernatant collected.

391  
392 **Lysozyme activity assay.** Lysozyme activity was measured by following the degradation of a  
393 commercially available PG preparation (lyophilized *Micrococcus lysodeikticus* cells from Sigma).  
394 Increasing concentrations of purified RsiV or LbpA were mixed with lysozyme (final concentration  
395 in assay, 10  $\mu$ g/ml) in 50  $\mu$ l in a 96 well plate. The reaction was started by the addition of 50  $\mu$ l  
396 PG substrate (*M. lysodeikticus* PG suspension in 50 mM Na phosphate, pH 7, 100 mM NaCl at  
397 an optical density of 1.8). PG lysis was monitored at 450 nm, every minute for 30 min (M200 Pro  
398 plate reader, Tecan).

399  
400 **Lysozyme MIC determination.** Overnight cultures were subcultured and grown to late log phase  
401 ( $OD_{600}$  of 1.0), then diluted in TY to  $10^6$  CFU/ml. For samples that were pre-incubated with  
402 lysozyme, lysozyme was added at the time and concentration indicated. A series of lysozyme  
403 concentrations was prepared in a 96-well plate in 50  $\mu$ l TY broth. Wells were inoculated with 50  
404  $\mu$ l of the dilute late log culture (i.e.  $0.5 \times 10^5$  CFU/well) and grown at 37°C for 16 hrs. Each well  
405 was then sampled by removing 10  $\mu$ l and diluting 1:10 in TY broth; 5  $\mu$ l of this dilution was spotted  
406 onto TY agar and incubated at 37°C for 24 hrs. The MIC was defined as the lowest concentration  
407 of lysozyme at which 5 or fewer colonies were found per spot.

408  
409 **Fixation protocol.** Cells were fixed as previously described (35, 50). Briefly, a 500  $\mu$ l aliquot of  
410 cells in growth medium was added to 100  $\mu$ l 16% paraformaldehyde (Alfa Aesar) and 20  $\mu$ l of 1M  
411  $NaPO_4$  buffer (pH 7.4). The sample was mixed, removed from the chamber, and incubated in the

412 dark at room temperature for 60 minutes. The samples were washed 3 times with phosphate-  
413 buffered saline (PBS), resuspended in 100  $\mu$ l PBS, and left in the dark for a minimum of 3 hrs to  
414 allow for maturation of the chromophore.

415

416 **Fluorescence measurements with a plate reader.** Fluorescence from bulk samples was  
417 measured using an Infinite M200 Pro plate reader (Tecan, Research Triangle Park, NC) as  
418 previously described (35, 39). Briefly, fixed cells in PBS were added to a 96-well microtiter plate  
419 (black, flat optical bottom). Fluorescence was recorded as follows: excitation at 554 nm, emission  
420 at 610 nm, and gain setting 140. The cell density (OD600) was also recorded and used to  
421 normalize the fluorescence reading.

422

#### 423 **Acknowledgements**

424 This work was supported by the National Institutes of Allergy and Infectious Disease NIH  
425 R01AI087834 to CDE and a graduate fellowship T32AI007511 to GMK. We thank Joe Sorg for  
426 providing the CRISPR mutagenesis plasmid. We would also like to thank members of the  
427 Ellermeier and Weiss labs for helpful comments.

428

429

430

431

432 **Figure Legends:**

433 **Figure 1.** Wildtype (GMK208) or  $\Delta csfV$  (GMK211) strains containing a  $P_{pdaV}$ -*rfp* reporter plasmid  
434 were grown to an OD<sub>600</sub> of 0.3, incubated with lysozyme for 1 hr, then fixed and removed from the  
435 anaerobic chamber. Samples were exposed to air overnight to allow for maturation of the  
436 chromophore. Fluorescence was measured via a plate reader.

437  
438 **Figure 2.** Pre-incubation with a sub-inhibitory concentration of lysozyme increases resistance  
439 level. A) Overnight cultures of wildtype or  $\Delta csfV$  (CDE2966) were sub-cultured and grown for  
440 ~8hrs; 20  $\mu$ g/ml lysozyme was added for the duration indicated prior to set up of the lysozyme  
441 MIC plates. B) Overnight cultures were sub-cultured and grown to an OD<sub>600</sub>= 0.3; varying sub-  
442 inhibitory concentrations of lysozyme were added as indicated and cultures incubated for ~5 hrs  
443 prior to set up of MIC.

444  
445 **Figure 3.** A) Overnight cultures were sub-cultured into TY medium and grown to an OD<sub>600</sub>= 0.3;  
446 20  $\mu$ g/ml lysozyme was added and incubated for 5 hrs prior to set up of MIC (WT, R20291;  $\Delta pgdA$ ,  
447 GMK241;  $\Delta pdaV$ , GMK152;  $\Delta csfV$  operon, GMK157;  $\Delta csfV$  operon  $\Delta pgdA$ , GMK243;  $\Delta pdaV$   
448  $\Delta pgdA$ , GMK301). B) Strains carrying either  $P_{xyI}$ -*pdaV* (pCE618) or an empty vector (pAP114)  
449 were constructed ( $\Delta csfV$  operon  $\Delta pgdA$  pAP114, GMK312;  $\Delta csfV$  operon  $\Delta pgdA$  pCE618,  
450 GMK313;  $\Delta pdaV$   $\Delta pgdA$  pAP114, GMK314;  $\Delta pdaV$   $\Delta pgdA$  pCE618, GMK315;  $\Delta pdaV$  pAP114,  
451 GMK316;  $\Delta pdaV$  pCE618, GMK317;  $\Delta csfV$  operon pAP114, GMK174;  $\Delta csfV$  operon pCE618,  
452 GMK177). Overnight cultures were sub-cultured into TY Thi<sub>10</sub> medium supplemented with 1%  
453 xylose. Cultures were grown to an OD<sub>600</sub>= 1.0 and a lysozyme MIC was set up with 1% xylose.

454  
455 **Figure 4.** Peptidoglycan was purified from cultures grown to mid-log (OD<sub>600</sub>= 0.6-0.8).  
456 Peptidoglycan was digested with mutanolysin. Fragments were separated using reversed-phase

457 HPLC and structures determined using mass spectrometry. B) Total percentages of deacetylated  
458 residues are shown for strains indicated (WT, R20291;  $\Delta pdaV$ , GMK152;  $\Delta pgdA$ , GMK241;  $\Delta pgdA$   
459  $\Delta pdaV$ , GMK301).

460

461

462 **Figure 5.** A) Peptidoglycan from *M. lysodeikticus* was combined with 10  $\mu$ g/ml lysozyme and  
463 purified RsiV or LbpA. The  $A_{450}$  was monitored every minute for 30 minutes to determine  
464 degradation of lysozyme. Degradation after 30 minutes is shown. B) Overnight cultures were sub-  
465 cultured into TY Thi<sub>10</sub> medium supplemented with 1% xylose and grown to OD<sub>600</sub>= 1.0 and a  
466 lysozyme MIC was set up with 1% xylose. A one-way ANOVA showed effect of the inhibitor  
467 proteins on lysozyme resistance was significant, F (2,9)= 9.8,  $p=0.0055$ .

468

469 **Figure S1.** Organization of the *csfV* operon in *C. difficile* strain R20291.

470

471 **Figure S2.** Contribution of putative polysaccharide deacetylases to the lysozyme MIC. A) MICs  
472 of in-frame deletions of individual genes (WT, R20291;  $\Delta csfV$ , CDE2966;  $\Delta csfV$  operon,  
473 GMK157). Overnight cultures were sub-cultured and grown to an OD<sub>600</sub> of 0.3, incubated with 20  
474  $\mu$ g/ml lysozyme for 5 hrs, then MICs were determined. B) Putative polysaccharide deacetylases  
475 were screened using CRISPRi knockdown in a  $\Delta csfV$  operon strain (*cdr1160*, LS136, LS137;  
476 *cdr1293*, LS142, LS143; *pgdA*, LS131, LS132; *cdr2485*, LS144, LS145; *cdr2613*, LS140, LS141;  
477 *cdr3106*, LS138, LS139; *cdr3115*, LS129, LS130; CRISPRi negative control, LS134). Overnight  
478 cultures grown with 1% xylose were sub-cultured in TY supplemented with 1% xylose and grown  
479 to an OD<sub>600</sub> of 1.0, then MICs were determined.

480

481 **Figure S3.** CRISPRi knockdown of *pgdA* was tested in JIR8094 strain backgrounds (JIR8094  
482 CRISPRi negative control, GMK358; JIR8094 CRISPRi *pgdA*, GMK256; JIR8094 *csfV::ltrB::ermB*

483 CRISPRi negative control, GMK361; JIR8094 *csfV::ltrB::ermB* CRISPRi *pgdA*, GMK359).  
484 Overnight cultures grown with 1% xylose were sub-cultured in TY supplemented with 1% xylose  
485 and grown to an OD<sub>600</sub> of 1.0, then MICs were determined.

486

487 **Figure S4.** *pgdA* is not activated by lysozyme. Strains carrying either P<sub>*pdav-rfp*</sub> (GMK208) or P<sub>*pgdA-rfp*</sub>-  
488 *rfp* (LS155) were sub-cultured and grown to an OD<sub>600</sub> of 0.3 then incubated with varying  
489 concentrations of lysozyme for 1 hr. Cultures were fixed, removed from the chamber and exposed  
490 to air overnight to allow for maturation of the chromophore. Fluorescence was measured via a  
491 plate reader.

492

493 **Figure S5.** Alignment of RsiV from *B. subtilis*, RsiV from *C. difficile*, and LbpA. The  $\sigma$ -factor  
494 binding domain is noted. Underlined residues indicate the transmembrane domain.

495

496 **Figure S6.** RsiV and LbpA were overexpressed and purified from *E. coli*. Peptidoglycan from *M.*  
497 *lysodeikticus* was combined with 10  $\mu$ g/ml hen egg white lysozyme and various concentrations of  
498 purified RsiV or LbpA. The A<sub>450</sub> was monitored every minute for 30 minutes to determine  
499 degradation of lysozyme.

500

501 **Figure S7.** Contribution of individual genes in the *csfV* operon on lysozyme resistance. A) MICs  
502 of in-frame deletions of individual genes (WT, R20291;  $\Delta$ *lbpA*, UM303). Overnight cultures were  
503 sub-cultured and grown to an OD<sub>600</sub> of 0.3, incubated with 20  $\mu$ g/ml lysozyme for 5 hrs, then MICs  
504 were determined. B) Single genes were exogenously expressed from a xylose-inducible  
505 expression vector in a  $\Delta$ *csfV* operon mutant strain ( $\Delta$ *csfV* operon EV, GMK174;  $\Delta$ *csfV* operon P<sub>*xyI*</sub>-  
506 *rsiV*, GMK176;  $\Delta$ *csfV* operon P<sub>*xyI*</sub>-*lbpA*, GMK178). Cultures were grown with 1% xylose to an  
507 OD<sub>600</sub> of 1.0 then MICs were determined.

508

509 **Figure S8.** CRISPRi knockdown was used to determine the contribution of *slpA* and the *dltABCD*  
510 operon to lysozyme resistance in a wildtype background, 2 different sgRNAs were tested for  
511 *dltABCD* and *csfV* (EV, LS134; *slpA*, GMK344; *dltABCD*, GMK345, GMK346; *csfV*, GMK347,  
512 GMK348). Overnight cultures grown with 1% xylose were sub-cultured in TY supplemented with  
513 1% xylose and grown to an OD<sub>600</sub> of 1.0 then MICs were determined.

514

515

516

517 **Table 1. Muropeptide Analysis**

| Peak # <sup>a</sup> | Muropeptide Structure <sup>b</sup> | m/z <sup>c</sup> |        | Area (%) of each muropeptide peak (mean ± SD) |                       |                       |                                  |
|---------------------|------------------------------------|------------------|--------|-----------------------------------------------|-----------------------|-----------------------|----------------------------------|
|                     |                                    | Predicted        | Actual | WT (n = 3)                                    | $\Delta pdaV$ (n = 4) | $\Delta pgdA$ (n = 4) | $\Delta pgdA\Delta pdaV$ (n = 4) |
| A                   | Tri                                | 893.5            | 892.9  | 0 ± 0.0                                       | 0 ± 0.1               | 1 ± 0.1               | 2 ± 0.2                          |
| 1                   | Tri, deAc                          | 851.4            | 851.4  | 1 ± 0.1                                       | 1 ± 0.1               | 1 ± 0.1               | 0 ± 0.1                          |
| 3                   | Tri-Gly                            | 950.5            | 949.9  | 2 ± 0.1                                       | 2 ± 0.2               | 4 ± 0.7               | 14 ± 1.0                         |
| 4                   | Tri-Gly, deAc                      | 908.4            | 908.4  | 6 ± 0.7                                       | 6 ± 0.8               | 6 ± 0.6               | 0 ± 0.1                          |
| 6                   | Tetra                              | 964.4            | 963.9  | 7 ± 0.7                                       | 7 ± 0.9               | 12 ± 1.4              | 14 ± 1.7                         |
| 7                   | Tetra, deAc                        | 922.4            | 922.4  | 25 ± 3.0                                      | 24 ± 2.2              | 17 ± 1.4              | 1 ± 0.4                          |
| C                   | Tri-Tri-Gly                        | 1802.7           | 1802.5 | 0 ± 0.4                                       | 0 ± 0.2               | 1 ± 0.2               | 12 ± 0.4                         |
| D                   | Tri-Tri                            | 1745.7           | 1745.5 | 1 ± 0.6                                       | 2 ± 0.7               | 2 ± 0.4               | 3 ± 0.2                          |
| 11a                 | Tri-Tri-Gly, deAcX2                | 1718.7           | 1718.8 | 5 ± 0.4                                       | 5 ± 0.4               | 4 ± 0.7               | 0 ± 0.2                          |
| 11b                 | Tri-Tri, deAcX2                    | 1661.7           | 1661.8 | 1 ± 0.1                                       | 1 ± 0.1               | 1 ± 0.2               | 1 ± 0.5                          |
| E                   | Tri-, Tetra-Gly                    | 1873.8           | 1873.5 | 1 ± 1.8                                       | 1 ± 1.7               | 5 ± 0.4               | 22 ± 2.5                         |
| 12                  | Tri-Tetra                          | 1816.8           | 1816.5 | 4 ± 0.7                                       | 4 ± 0.5               | 9 ± 1.3               | 2 ± 2.5                          |
| 14                  | Tri-Tetra, deAcX1                  | 1774.8           | 1774.8 | 5 ± 0.6                                       | 5 ± 0.4               | 5 ± 0.3               | 1 ± 0.1                          |
| 15a                 | Tri-Tetra, deAcX2                  | 1732.7           | 1732.7 | 20 ± 1.0                                      | 20 ± 1.1              | 13 ± 0.9              | 0 ± 0.2                          |
| 16                  | Tri-Tetra, deAcX1                  | 1774.8           | 1774.8 | 1 ± 0.2                                       | 1 ± 0.2               | 1 ± 0.1               | 0 ± 0.0                          |
| F                   | Tri-Tetra                          | 1816.8           | 1816.4 | 0 ± 0.5                                       | 0 ± 0.4               | 1 ± 0.1               | 7 ± 0.2                          |
| 17                  | Tri-Tetra, deAcX2                  | 1732.7           | 1732.7 | 7 ± 0.7                                       | 6 ± 0.9               | 3 ± 1.0               | 0 ± 0.1                          |
| G                   | Tetra-Tetra                        | 1887.8           | 1887.4 | 1 ± 1.1                                       | 0 ± 0.9               | 2 ± 1.8               | 7 ± 0.6                          |
| 17a                 | Tetra-Tetra                        | 1887.8           | 1887.7 | 1 ± 0.3                                       | 1 ± 0.6               | 2 ± 0.2               | 0 ± 0.1                          |
| 19                  | Tetra-Tetra, deAcX2                | 1803.8           | 1803.6 | 2 ± 0.4                                       | 2 ± 0.2               | 2 ± 0.2               | 1 ± 0.4                          |
| 20                  | Tetra-Tetra, deAcX1                | 1845.8           | 1845.7 | 5 ± 0.0                                       | 5 ± 0.5               | 3 ± 0.2               | 1 ± 0.5                          |
| H                   | Tri-Tri-Tri-Gly                    | 2654.9           | 2655.6 | 0 ± 0.0                                       | 0 ± 0.0               | 0 ± 0.3               | 5 ± 0.3                          |
| 21                  | Tetra-Tetra, deAcX2                | 1803.8           | 1803.6 | 3 ± 0.2                                       | 3 ± 0.2               | 2 ± 0.1               | 1 ± 1.0                          |
| I                   | Tri-Tri-Tetra                      | 2669.0           | 2669.7 | 0 ± 0.2                                       | 0 ± 0.3               | 0 ± 0.3               | 4 ± 0.4                          |
| 23                  | Tri-Tri-Tetra, deAcX3              | 2543.1           | 2542.8 | 3 ± 0.3                                       | 3 ± 0.3               | 1 ± 0.2               | 1 ± 1.0                          |

518 <sup>a</sup> Peak name as identified in (13) or as labeled in Fig. 4.

519 <sup>b</sup> Peptide side chains are indicated; each peptide is attached to a disaccharide. deAcX1,  
520 deAcX2, and deAcX3 refer to one, two, or three deacetylated disaccharides, respectively.

521 <sup>c</sup> m/z for [M+Na]<sup>+</sup> ion.

522

523 **Table 2. Strains**

| Strain                      | Genotype and Description                                                                                                                                                                                                                 | Reference* |
|-----------------------------|------------------------------------------------------------------------------------------------------------------------------------------------------------------------------------------------------------------------------------------|------------|
| <b><i>E. coli</i></b>       |                                                                                                                                                                                                                                          |            |
| OmniMAX – 2 T1 <sup>R</sup> | F' [ <i>proAB+</i> <i>lacIq lacZ</i> ΔM15 Tn10(Tet <sup>R</sup> ) Δ( <i>ccdAB</i> )] <i>mcrA</i> Δ( <i>mrr-hsdRMS-mcrBC</i> ) Φ80 <i>lacZ</i> ΔM15 Δ( <i>lacZYA-argF</i> ) U169 <i>endA1 recA1 supE44 thi-1 gyrA96 relA1 tonA panD</i> . | Invitrogen |
| XL1-Blue                    | <i>endA1 gyrA96(nal<sup>R</sup>) thi-1 recA1 relA1 lac glnV44</i> [F' <i>proAB<sup>+</sup> lac<sup>I</sup> Δ(lacZ)M15</i> ] <i>hsdR17</i> (r <sub>K</sub> <sup>-</sup> m <sub>K</sub> <sup>+</sup> ) Tn10(Tet <sup>R</sup> )             |            |
| HB101/pRK24                 | F– <i>mcrB mrr hsdS20</i> (r <sub>B</sub> <sup>-</sup> m <sub>B</sub> <sup>-</sup> ) <i>recA13 leuB6 ara-14 proA2 lacY1 galK2 xyl-5 mtl-1 rpsL20</i>                                                                                     | (51)       |
| BL21λDE3 Rosetta            | <i>huA2 [lon] ompT gal</i> (λ DE3) [ <i>dcm</i> ] Δ <i>hsdS</i><br>λ DE3 = λ <i>sBamHI</i> Δ <i>EcoRI-B int::(lacI::PlacUV5::T7) i21 Δnin5</i> / pRARE (CamR)                                                                            | Novagen    |
| MG1655                      | Wild-type <i>E. coli</i>                                                                                                                                                                                                                 |            |
| GMK231                      | BL21λDE3 Rosetta pCE596 (P <sub>T7</sub> -6 <i>xhis-rtev-rsiV</i> <sup>70-289</sup> <i>amp</i> )                                                                                                                                         |            |
| GMK232                      | BL21λDE3 Rosetta pCE469 (P <sub>T7</sub> -6 <i>xhis-lbpA</i> <sup>35-251</sup> <i>amp</i> )                                                                                                                                              |            |
| <b><i>B. subtilis</i></b>   |                                                                                                                                                                                                                                          |            |
| BS49                        | Tn916 donor strain                                                                                                                                                                                                                       |            |
| <b><i>C. difficile</i></b>  |                                                                                                                                                                                                                                          |            |
| JIR8094                     | Spontaneous erythromycin-sensitive derivative of strain 630 (Ribotype 012)                                                                                                                                                               | (40)       |
| TCD20                       | JIR8094 <i>csfV::ltrB::ermB</i>                                                                                                                                                                                                          | (15)       |
| GMK358                      | JIR8094 pIA34 (negative control)                                                                                                                                                                                                         |            |
| GMK356                      | JIR8094 pCE655 (CRISPRi <i>pgdA-1</i> )                                                                                                                                                                                                  |            |
| GMK361                      | JIR8094 <i>csfV::ltrB::ermB</i> pIA34 (negative control)                                                                                                                                                                                 |            |
| GMK359                      | JIR8094 <i>csfV::ltrB::ermB</i> pCE655 (CRISPRi <i>pgdA-1</i> )                                                                                                                                                                          |            |
| R20291                      | Wild-type <i>C. difficile</i> strain from UK outbreak (ribotype 027)                                                                                                                                                                     | (52)       |
| CDE2966                     | R20291 Δ <i>csfV</i>                                                                                                                                                                                                                     |            |
| GMK157                      | R20291 Δ <i>csfV</i> operon ( <i>pdaV-cdr1411</i> )                                                                                                                                                                                      |            |
| GMK152                      | R20291 Δ <i>pdaV</i>                                                                                                                                                                                                                     |            |
| UM303                       | R20291 Δ <i>lbpA</i>                                                                                                                                                                                                                     |            |
| GMK241                      | R20291 Δ <i>pgdA</i>                                                                                                                                                                                                                     |            |
| GMK243                      | R20291 Δ <i>csfV</i> operon Δ <i>pgdA</i>                                                                                                                                                                                                |            |
| GMK301                      | R20291 Δ <i>pgdA</i> Δ <i>pdaV</i>                                                                                                                                                                                                       |            |
| GMK208                      | R20291 pRAN738 (P <sub><i>pdaV-rfp</i></sub> )                                                                                                                                                                                           |            |
| GMK211                      | R20291 Δ <i>csfV</i> pRAN738 (P <sub><i>pdaV-rfp</i></sub> )                                                                                                                                                                             |            |
| GMK174                      | R20291 Δ <i>csfV</i> operon pAP114                                                                                                                                                                                                       |            |
| GMK176                      | R20291 Δ <i>csfV</i> operon pCE617 (P <sub><i>xyl-rsiV</i></sub> )                                                                                                                                                                       |            |
| GMK177                      | R20291 Δ <i>csfV</i> operon pCE618 (P <sub><i>xyl-pdaV</i></sub> )                                                                                                                                                                       |            |
| GMK178                      | R20291 Δ <i>csfV</i> operon pCE619 (P <sub><i>xyl-lbpA</i></sub> )                                                                                                                                                                       |            |
| GMK314                      | R20291 Δ <i>pdaV</i> Δ <i>pgdA</i> pAP114 (P <sub><i>xyl-rfp</i></sub> )                                                                                                                                                                 |            |
| GMK315                      | R20291 Δ <i>pdaV</i> Δ <i>pgdA</i> pCE618 (P <sub><i>xyl-pdaV</i></sub> )                                                                                                                                                                |            |
| GMK316                      | R20291 Δ <i>pdaV</i> pAP114 (P <sub><i>xyl-rfp</i></sub> )                                                                                                                                                                               |            |
| GMK317                      | R20291 Δ <i>pdaV</i> pCE618 (P <sub><i>xyl-pdaV</i></sub> )                                                                                                                                                                              |            |
| GMK248                      | R20291 Δ <i>csfV</i> operon Δ <i>pgdA</i> pAP114 (P <sub><i>xyl-rfp</i></sub> )                                                                                                                                                          |            |
| GMK249                      | R20291 Δ <i>csfV</i> operon Δ <i>pgdA</i> pCE617 (P <sub><i>xyl-rsiV</i></sub> )                                                                                                                                                         |            |
| GMK250                      | R20291 Δ <i>csfV</i> operon Δ <i>pgdA</i> pCE619 (P <sub><i>xyl-lbpA</i></sub> )                                                                                                                                                         |            |



|        |                                                                |      |
|--------|----------------------------------------------------------------|------|
| LS155  | R20291 pCE670 ( $P_{pgdA-rfp}$ )                               |      |
| LS129  | R20291 $\Delta csfV$ operon pCE653 (CRISPRi <i>cdr3115-1</i> ) |      |
| LS130  | R20291 $\Delta csfV$ operon pCE654 (CRISPRi <i>cdr3115-2</i> ) |      |
| LS131  | R20291 $\Delta csfV$ operon pCE655 (CRISPRi <i>pgdA-1</i> )    |      |
| LS132  | R20291 $\Delta csfV$ operon pCE656 (CRISPRi <i>pgdA-2</i> )    |      |
| LS134  | R20291 $\Delta csfV$ operon pIA34 (CRISPRi negative control)   |      |
| LS136  | R20291 $\Delta csfV$ operon pCE657 (CRISPRi <i>cdr1160-1</i> ) |      |
| LS137  | R20291 $\Delta csfV$ operon pCE658 (CRISPRi <i>cdr1160-2</i> ) |      |
| LS138  | R20291 $\Delta csfV$ operon pCE659 (CRISPRi <i>cdr3106-1</i> ) |      |
| LS139  | R20291 $\Delta csfV$ operon pCE660 (CRISPRi <i>cdr3106-2</i> ) |      |
| LS140  | R20291 $\Delta csfV$ operon pCE661 (CRISPRi <i>cdr2613-1</i> ) |      |
| LS141  | R20291 $\Delta csfV$ operon pCE662 (CRISPRi <i>cdr2613-2</i> ) |      |
| LS142  | R20291 $\Delta csfV$ operon pCE663 (CRISPRi <i>cdr1293-1</i> ) |      |
| LS143  | R20291 $\Delta csfV$ operon pCE664 (CRISPRi <i>cdr1293-1</i> ) |      |
| LS144  | R20291 $\Delta csfV$ operon pCE651 (CRISPRi <i>cdr2485-1</i> ) |      |
| LS145  | R20291 $\Delta csfV$ operon pCE652 (CRISPRi <i>cdr2485-2</i> ) |      |
| GMK344 | R20291 pIA39 (CRISPRi <i>slpA-1</i> )                          | (39) |
| GMK345 | R20291 pCE738 (CRISPRi <i>dlt-1</i> )                          |      |
| GMK346 | R20291 pCE739 (CRISPRi <i>dlt-1</i> )                          |      |
| GKM347 | R20291 pCE746 (CRISPRi <i>csfV-1</i> )                         |      |
| GMK348 | R20291 pCE747 (CRISPRi <i>csfV-2</i> )                         |      |

524 \*This study unless otherwise noted.

525 **Table 3. Plasmids**

| Plasmid | Relevant Features                                                                                                                                                     | Reference* |
|---------|-----------------------------------------------------------------------------------------------------------------------------------------------------------------------|------------|
| pRPF185 | <i>E. coli</i> - <i>C. difficile</i> shuttle vector with tetracycline-inducible promoter. $P_{tet}::gusA$ <i>cat</i> <i>CD6ori</i> <i>RP4oriT-traJ</i> <i>pMB1ori</i> | (53)       |
| pRAN738 | $P_{pdaV}::mCherryOpt$ <i>cat</i>                                                                                                                                     | (35)       |
| pAP114  | $P_{xyl}::mCherryOpt$ <i>cat</i>                                                                                                                                      | (39)       |
| pCE617  | $P_{xyl}::rsiV$ <i>cat</i>                                                                                                                                            |            |
| pCE618  | $P_{xyl}::pdaV$ <i>cat</i>                                                                                                                                            |            |
| pCE619  | $P_{xyl}::lbpA$ <i>cat</i>                                                                                                                                            |            |
| pCE596  | $P_{T7-6xhis-rtev-rsiV}^{60-289}$ <i>amp</i>                                                                                                                          |            |
| pCE469  | $P_{T7-6xhis-rtev-lbpA}^{35-251}$ <i>amp</i>                                                                                                                          |            |
| pCE641  | $P_{xyl}::Cas9-opt \Delta rasP$ $P_{gdh}::sgRNA-rasP$ <i>catP</i>                                                                                                     |            |
| pCE651  | $P_{xyl}::dCas9-opt$ $P_{gdh}::sgRNA-cdr2495-1$ <i>catP</i>                                                                                                           |            |
| pCE652  | $P_{xyl}::dCas9-opt$ $P_{gdh}::sgRNA-cdr2495-2$ <i>catP</i>                                                                                                           |            |
| pCE653  | $P_{xyl}::dCas9-opt$ $P_{gdh}::sgRNA-cdr3115-1$ <i>catP</i>                                                                                                           |            |
| pCE654  | $P_{xyl}::dCas9-opt$ $P_{gdh}::sgRNA-cdr3115-2$ <i>catP</i>                                                                                                           |            |
| pCE655  | $P_{xyl}::dCas9-opt$ $P_{gdh}::sgRNA-pgdA-1$ <i>catP</i>                                                                                                              |            |
| pCE656  | $P_{xyl}::dCas9-opt$ $P_{gdh}::sgRNA-pgdA-2$ <i>catP</i>                                                                                                              |            |
| pCE657  | $P_{xyl}::dCas9-opt$ $P_{gdh}::sgRNA-cdr1160-1$ <i>catP</i>                                                                                                           |            |
| pCE658  | $P_{xyl}::dCas9-opt$ $P_{gdh}::sgRNA-cdr1160-2$ <i>catP</i>                                                                                                           |            |
| pCE659  | $P_{xyl}::dCas9-opt$ $P_{gdh}::sgRNA-cdr3106-1$ <i>catP</i>                                                                                                           |            |
| pCE660  | $P_{xyl}::dCas9-opt$ $P_{gdh}::sgRNA-cdr3106-2$ <i>catP</i>                                                                                                           |            |
| pCE661  | $P_{xyl}::dCas9-opt$ $P_{gdh}::sgRNA-cdr2613-1$ <i>catP</i>                                                                                                           |            |
| pCE662  | $P_{xyl}::dCas9-opt$ $P_{gdh}::sgRNA-cdr2613-2$ <i>catP</i>                                                                                                           |            |
| pCE663  | $P_{xyl}::dCas9-opt$ $P_{gdh}::sgRNA-cdr1293-1$ <i>catP</i>                                                                                                           |            |
| pCE664  | $P_{xyl}::dCas9-opt$ $P_{gdh}::sgRNA-cdr1293-2$ <i>catP</i>                                                                                                           |            |
| pCE670  | $P_{pgdA}::mCherry Opt$ <i>cat</i>                                                                                                                                    |            |
| pIA34   | $P_{xyl}::dCas9-opt$ $P_{gdh}::sgRNA-neg$ <i>catP</i>                                                                                                                 |            |
| pIA39   | $P_{xyl}::dCas9-opt$ $P_{gdh}::sgRNA-slpA-2$ <i>catP</i>                                                                                                              |            |
| pCE738  | $P_{xyl}::dCas9-opt$ $P_{gdh}::sgRNA-dlt-1$ <i>catP</i>                                                                                                               |            |
| pCE739  | $P_{xyl}::dCas9-opt$ $P_{gdh}::sgRNA-dlt-2$ <i>catP</i>                                                                                                               |            |
| pCE746  | $P_{xyl}::dCas9-opt$ $P_{gdh}::sgRNA-csfV-1$ <i>catP</i>                                                                                                              |            |
| pCE747  | $P_{xyl}::dCas9-opt$ $P_{gdh}::sgRNA-csfV-2$ <i>catP</i>                                                                                                              |            |
| pYZ101  | $P_{tet}::Cas9-opt \Delta csfV$ $P_{gdh}::sgRNA-csfV$ <i>catP</i>                                                                                                     |            |
| pGK112  | $P_{tet}::Cas9-opt \Delta pdaV$ $P_{gdh}::sgRNA-pdaV$ <i>catP</i>                                                                                                     |            |
| pGK115  | $P_{tet}::Cas9-opt \Delta pdaV-cdr1411$ $P_{gdh}::sgRNA-csfV$ <i>catP</i>                                                                                             |            |

|        |                                                            |  |
|--------|------------------------------------------------------------|--|
| pCE678 | $P_{xyI}::Cas9-opt \Delta pgdA P_{gdh}::sgRNA-pgdA-2 catP$ |  |
| pIA16  | $P_{tet}::Cas9-opt \Delta lbpA 9 P_{gdh}::sgRNA-lbpA catP$ |  |

526 \*This study unless otherwise noted.

527

528

## 529 References

- 530 1. Rupnik M, Wilcox MH, Gerding DN. 2009. *Clostridium difficile* infection: new  
531 developments in epidemiology and pathogenesis. *Nat Rev Micro* 7:526–536.
- 532 2. Pépin J, Valiquette L, Cossette B. 2005. Mortality attributable to nosocomial *Clostridium*  
533 *difficile*-associated disease during an epidemic caused by a hypervirulent strain in  
534 Quebec. *CMAJ* 173:1037–1042.
- 535 3. Lyras D, Connor JRO, Howarth PM, Sambol SP, Glen P, Phumoonna T, Poon R, Adams  
536 V, Vedantam G, Gerding DN, Rood JI. 2009. Toxin B is essential for virulence of  
537 *Clostridium difficile*. *Nature* 458:1176–1179.
- 538 4. Voth DE, Ballard JD. 2005. *Clostridium difficile* Toxins: Mechanism of Action and Role in  
539 Disease. *Clin Microbiol Rev* 18:247–263.
- 540 5. Shen A. 2012. *Clostridium difficile* Toxins : Mediators of Inflammation. *J Innate Immun*  
541 149–158.
- 542 6. Kelly CP, LaMont JT. 1998. *Clostridium difficile* Infection. *Annu Rev Med* 49:375–90.
- 543 7. Percy MG, Gründling A. 2014. Lipoteichoic Acid Synthesis and Function in Gram-Positive  
544 Bacteria. *Annu Rev Microbiol* 68:81–100.
- 545 8. Reid CW, Vinogradov E, Li J, Jarrell HC, Logan SM, Brisson JR. 2012. Structural  
546 characterization of surface glycans from *Clostridium difficile*. *Carbohydr Res* 354:65–73.
- 547 9. Ganeshapillai J, Vinogradov E, Rousseau J, Weese JS, Monteiro MA. 2008. *Clostridium*  
548 *difficile* cell-surface polysaccharides composed of pentaglycosyl and hexaglycosyl  
549 phosphate repeating units. *Carbohydr Res* 343:703–710.
- 550 10. Kirk JA, Banerji O, Fagan RP. 2017. Characteristics of the *Clostridium difficile* cell  
551 envelope and its importance in therapeutics. *Microb Biotechnol* 10:76–90.
- 552 11. Callewaert L, Michiels C. 2010. Lysozymes in the animal kingdom. *J Biosci*.
- 553 12. Chipman DM, Sharon N. 1969. Mechanism of Lysozyme Action. *Science* (80- ) 165:454–  
554 465.

- 555 13. Peltier J, Courtin P, El Meouche I, Lemée L, Chapot-Chartier MP, Pons JL. 2011.  
556 *Clostridium difficile* has an original peptidoglycan structure with a high level of N-  
557 acetylglucosamine deacetylation and mainly 3-3 cross-links. J Biol Chem 286:29053–  
558 29062.
- 559 14. Davis KM, Weiser JN. 2011. Modifications to the Peptidoglycan Backbone Help Bacteria  
560 To Establish Infection. Infect Immun 79:562–570.
- 561 15. Ho TD, Williams KB, Chen Y, Helm RF, Popham DL, Ellermeier CD. 2014. *Clostridium*  
562 *difficile* extracytoplasmic function  $\sigma$  factor  $\sigma^V$  regulates lysozyme resistance and is  
563 necessary for pathogenesis in the hamster model of infection. Infect Immun 82:2345–55.
- 564 16. Ho TD, Ellermeier CD. 2011. PrsW Is Required for Colonization, Resistance to  
565 Antimicrobial Peptides , and Expression of Extracytoplasmic Function  $\sigma$  Factors in  
566 *Clostridium difficile*. Infect Immun 79:3229–3238.
- 567 17. Staron A, Sofia HJ, Dietrich S, Ulrich LE, Liesegang H, Mascher T. 2009. The third pillar  
568 of bacterial signal transduction : classification of the extracytoplasmic function (ECF)  $\sigma$   
569 factor protein family. Mol Microbiol 74:557–581.
- 570 18. Benachour A, Muller C, Dabrowski-coton M, Breton Y Le, Giard J, Rince A, Auffray Y,  
571 Hartke A. 2005. The *Enterococcus faecalis* SigV Protein Is an Extracytoplasmic Function  
572 Sigma Factor Contributing to Survival following Heat, Acid, and Ethanol Treatments. J  
573 Bacteriol 187:1022–1035.
- 574 19. Ho TD, Hastie JL, Intile PJ, Ellermeier CD. 2011. The *Bacillus subtilis* Extracytoplasmic  
575 Function  $\sigma$  Factor  $\sigma^V$  Is Induced by Lysozyme and Provides Resistance to Lysozyme. J  
576 Bacteriol 193:6215–6222.
- 577 20. Hastie JL, Williams KB, Ellermeier CD. 2013. The activity of  $\sigma^V$ , an Extra-Cytoplasmic  
578 Function  $\sigma$  factor of *Bacillus subtilis*, is controlled by a regulated proteolysis of the anti- $\sigma$   
579 factor RsiV. J Bacteriol 195:3135–3144.
- 580 21. Hastie JL, Williams KB, Sepúlveda C, Houtman JC, Forest KT, Ellermeier CD. 2014.

- 581 Evidence of a Bacterial Receptor for Lysozyme: Binding of Lysozyme to the Anti- $\sigma$  Factor  
582 RsiV Controls Activation of the ECF  $\sigma$  Factor  $\sigma^V$ . PLoS Genet 10.
- 583 22. Neuhaus FC, Baddiley J. 2003. A Continuum of Anionic Charge: Structures and  
584 Functions of D- Alanyl- Teichoic Acids in Gram- Positive Bacteria. Microbiol Mol Biol Rev  
585 67:686.
- 586 23. Nizet V. 2006. Antimicrobial Peptide Resistance Mechanisms of Human Bacterial  
587 Pathogens. Curr Issues Mol Biol 11–26.
- 588 24. McBride SM, Sonenshein AL. 2011. The *dlt* operon confers resistance to cationic  
589 antimicrobial peptides in *Clostridium difficile*. Microbiology 157:1457–1465.
- 590 25. Callewaert L, Herreweghe JM Van, Vanderkelen L, Leysen S, Voet A, Michiels CW.  
591 2012. Guards of the great wall : bacterial lysozyme inhibitors. Trends Microbiol 20:501–  
592 510.
- 593 26. Leysen S, Van Herreweghe JM, Callewaert L, Heirbaut M, Buntinx P, Michiels CW,  
594 Strelkov S V. 2011. Molecular basis of bacterial defense against host lysozymes: X-ray  
595 structures of periplasmic lysozyme inhibitors PliI and PliC. J Mol Biol 405:1233–1245.
- 596 27. Monchois V, Abergel C, Sturgis J, Jeudy S, Claverie JM. 2001. *Escherichia coli* *ykfE*  
597 ORFan Gene Encodes a Potent Inhibitor of C-type Lysozyme. J Biol Chem 276:18437–  
598 18441.
- 599 28. Yum S, Kim MJ, Xu Y, Jin XL, Yoo HY, Park JW, Gong JH, Choe KM, Lee BL, Ha NC.  
600 2009. Structural basis for the recognition of lysozyme by MliC, a periplasmic lysozyme  
601 inhibitor in Gram-negative bacteria. Biochem Biophys Res Commun 378:244–248.
- 602 29. Vollmer W. 2008. Structural variation in the glycan strands of bacterial peptidoglycan.  
603 FEMS Microbiol Rev 32:287–306.
- 604 30. Vollmer W, Tomasz A. 2000. The *pgdA* gene encodes for a peptidoglycan N-  
605 acetylglucosamine deacetylase in *Streptococcus pneumoniae*. J Biol Chem 275:20496–  
606 20501.

- 607 31. Guariglia-oropeza V, Helmann JD. 2011. *Bacillus subtilis*  $\sigma^V$  Confers Lysozyme  
608 Resistance by Activation of Two Cell Wall Modification Pathways, Peptidoglycan O-  
609 Acetylation and D -Alanylation of Teichoic Acids. *J Bacteriol* 193:6223–6232.
- 610 32. Rolain T, Bernard E, Beaussart A, Degand H, Courtin P, Egge-Jacobsen W, Bron PA,  
611 Morsomme P, Kleerebezem M, Chapot-Chartier MP, Dufrêne YF, Hols P. 2013. O-  
612 glycosylation as a novel control mechanism of peptidoglycan hydrolase activity. *J Biol*  
613 *Chem* 288:22233–22247.
- 614 33. Kobayashi K, Putu Sudiarta I, Kodama T, Fukushima T, Ara K, Ozaki K, Sekiguchi J.  
615 2012. Identification and characterization of a novel polysaccharide deacetylase C (PdaC)  
616 from *Bacillus subtilis*. *J Biol Chem* 287:9765–9776.
- 617 34. Hébert L, Courtin P, Torelli R, Sanguinetti M, Chapot-Chartier MP, Auffray Y, Benachour  
618 A. 2007. *Enterococcus faecalis* constitutes an unusual bacterial model in lysozyme  
619 resistance. *Infect Immun* 75:5390–5398.
- 620 35. Ransom EM, Ellermeier CD, Weiss DS. 2015. Use of mCherry red fluorescent protein for  
621 studies of protein localization and gene expression in *Clostridium difficile*. *Appl Environ*  
622 *Microbiol* 81:1652–1660.
- 623 36. Woods EC, Nawrocki KL, Suárez JM, McBride SM. 2016. The *Clostridium difficile* Dlt  
624 Pathway Is Controlled by the Extracytoplasmic Function Sigma Factor  $\sigma^V$  in Response to  
625 Lysozyme. *Infect Immun* 84:1902–1916.
- 626 37. McAllister KN, Bouillaut L, Kahn JN, Self WT, Sorg JA. 2017. Using CRISPR-Cas9-  
627 mediated genome editing to generate *C. difficile* mutants defective in selenoproteins  
628 synthesis. *Sci Rep* 1–12.
- 629 38. Paley S, Karp PD. 2017. Update notifications for the BioCyc collection of databases.  
630 *Database (Oxford)* 2017:1–4.
- 631 39. Müh U, Pannullo AG, Weiss DS, Ellermeier CD. 2019. A Xylose-Inducible Expression  
632 System and a CRISPR Interference Plasmid for Targeted Knockdown of Gene

- 633 Expression in *Clostridioides difficile*. J Bacteriol 201:1–12.
- 634 40. O'Connor JR, Lyras D, Farrow KA, Adams V, Powell DR, Hinds J, Cheung JK, Rood JI.  
635 2006. Construction and analysis of chromosomal *Clostridium difficile* mutants. Mol  
636 Microbiol 61:1335–51.
- 637 41. Ragland SA, Criss AK. 2017. From bacterial killing to immune modulation: Recent  
638 insights into the functions of lysozyme. PLoS Pathog 13:1–22.
- 639 42. Bera A, Herbert S, Jakob A, Vollmer W, Götz F. 2005. Why are pathogenic staphylococci  
640 so lysozyme resistant? The peptidoglycan O-acetyltransferase OatA is the major  
641 determinant for lysozyme resistance of *Staphylococcus aureus*. Mol Microbiol 55:778–  
642 787.
- 643 43. Aubry C, Goulard C, Nahori MA, Cayet N, Decalf J, Sachse M, Boneca IG, Cossart P,  
644 Dussurget O. 2011. OatA, a peptidoglycan O-acetyltransferase involved in *Listeria*  
645 *monocytogenes* immune escape, is critical for virulence. J Infect Dis 204:731–740.
- 646 44. Jeune L, Torelli R, Sanguinetti M, Giard J, Hartke A, Auffray Y, Benachour A. 2010. The  
647 Extracytoplasmic Function Sigma Factor SigV Plays a Key Role in the Original Model of  
648 Lysozyme Resistance and Virulence of *Enterococcus faecalis*. PLoS One 5.
- 649 45. Asai K, Yamaguchi H, Kang CM, Yoshida KI, Fujita Y, Sadaie Y. 2003. DNA microarray  
650 analysis of *Bacillus subtilis* sigma factors of extracytoplasmic function family. FEMS  
651 Microbiol Lett 220:155–160.
- 652 46. Benachour A, Ladjouzi R, Le Jeune A, Hébert L, Thorpe S, Courtin P, Chapot-Chartier  
653 MP, Prajsnar TK, Foster SJ, Mesnage S. 2012. The Lysozyme-Induced Peptidoglycan N-  
654 Acetylglucosamine Deacetylase *pgda* (EF1843) Is Required for *Enterococcus faecalis*  
655 Virulence. J Bacteriol 194:6066–6073.
- 656 47. Kirk JA, Fagan RP. 2016. Heat shock increases conjugation efficiency in *Clostridium*  
657 *difficile*. Anaerobe.
- 658 48. Benchling. 2018. Benchling. San Francisco, CA.



- 659 49. Popham DL, Helin J, Costello CE, Setlow P. 1996. Analysis of the peptidoglycan  
660 structure of *Bacillus subtilis* endospores. *J Bacteriol* 178:6451–6458.
- 661 50. Ransom EM, Williams KB, Weiss DS, Ellermeier CD. 2014. Identification and  
662 Characterization of a Gene Cluster Required for Proper Rod Shape, Cell Division, and  
663 Pathogenesis in *Clostridium difficile*. *J Bacteriol* 196:2290–2300.
- 664 51. Trieu-Cuot P, Arthur M, Courvalin P. 1987. Origin, Evolution and Dissemination of  
665 Antibiotic Resistance Genes. *Microbiol Sci* 4:263–6.
- 666 52. Stabler RA, He M, Dawson L, Martin M, Valiente E, Corton C, Lawley TD, Sebahia M,  
667 Quail MA, Rose G, Gerding DN, Gibert M, Popoff MR, Parkhill J, Dougan G, Wren BW.  
668 2009. Comparative genome and phenotypic analysis of *Clostridium difficile* 027 strains  
669 provides insight into the evolution of a hypervirulent. *Genome Biology* 10:1–15.
- 670 53. Fagan RP, Fairweather NF. 2011. *Clostridium difficile* has two parallel and essential sec  
671 secretion systems. *J Biol Chem* 286:27483–27493.
- 672

Figure 1

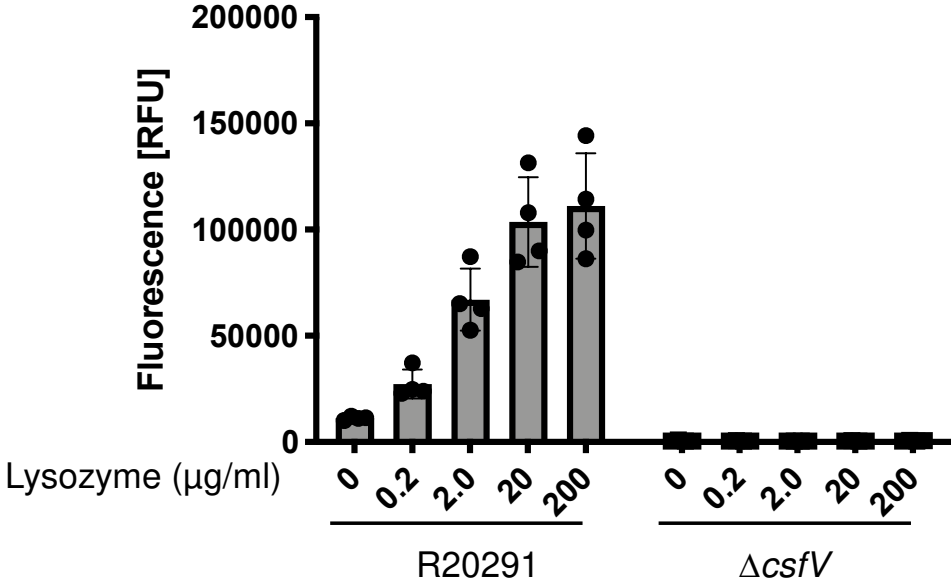

**Figure 1.** Wildtype (GMK208) or  $\Delta csfV$  (GMK211) strains containing a  $P_{pdaV}$ -*rfp* reporter plasmid were grown to an  $OD_{600}$  of 0.3, incubated with lysozyme for 1 hr, then fixed and removed from the anaerobic chamber. Samples were exposed to air overnight to allow for maturation of the chromophore. Fluorescence was measured via a plate reader.

Figure 2

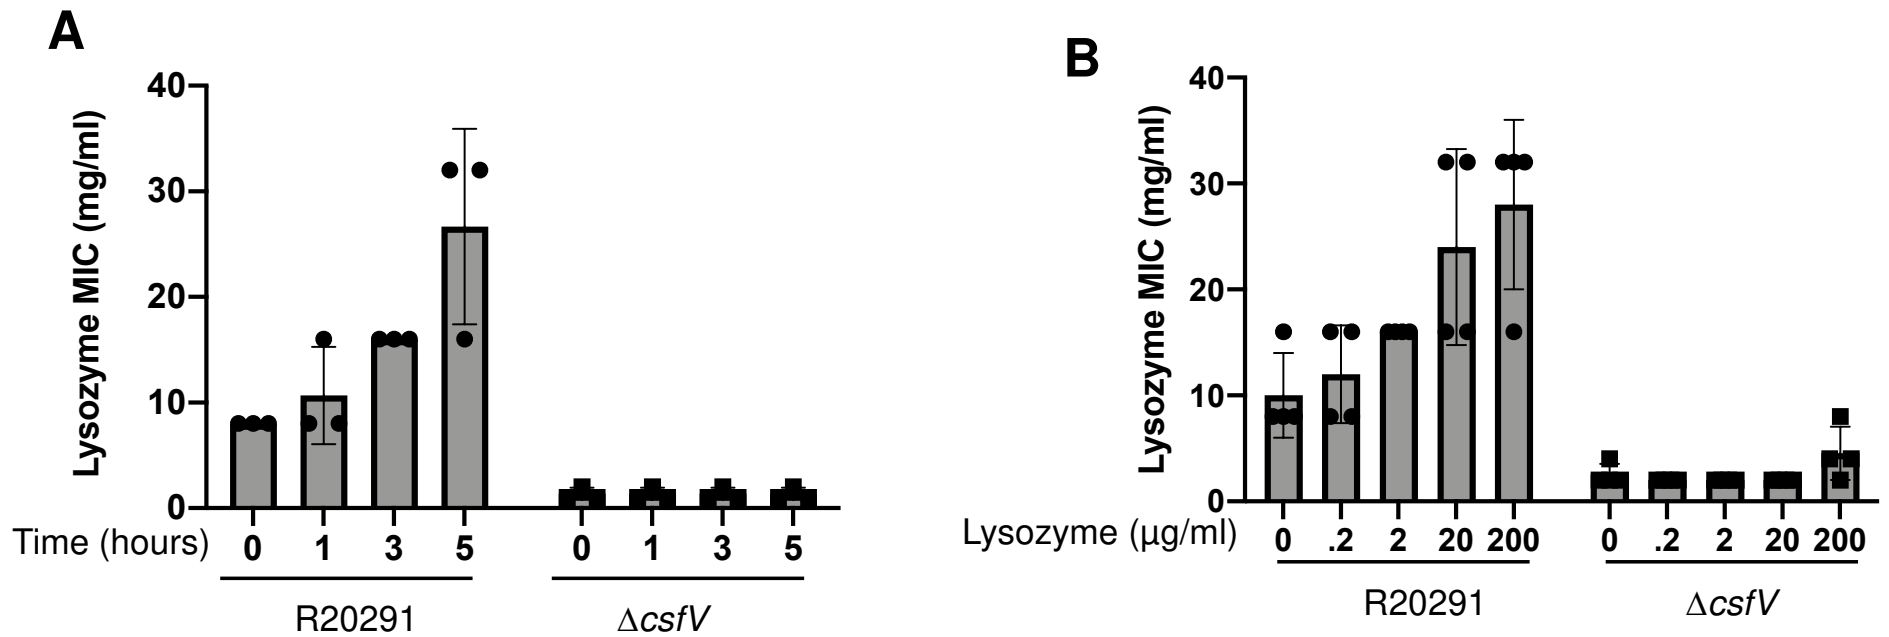

**Figure 2.** Pre-incubation with a sub-inhibitory concentration of lysozyme increases resistance level. A) Overnight cultures of wildtype or  $\Delta csfV$  (CDE2966) were sub-cultured and grown for ~8hrs; 20  $\mu\text{g/ml}$  lysozyme was added for the duration indicated prior to set up of the lysozyme MIC plates. B) Overnight cultures were sub-cultured and grown to an  $\text{OD}_{600} = 0.3$ ; varying sub-inhibitory concentrations of lysozyme were added as indicated and cultures incubated for ~5 hrs prior to set up of MIC.

Figure 3

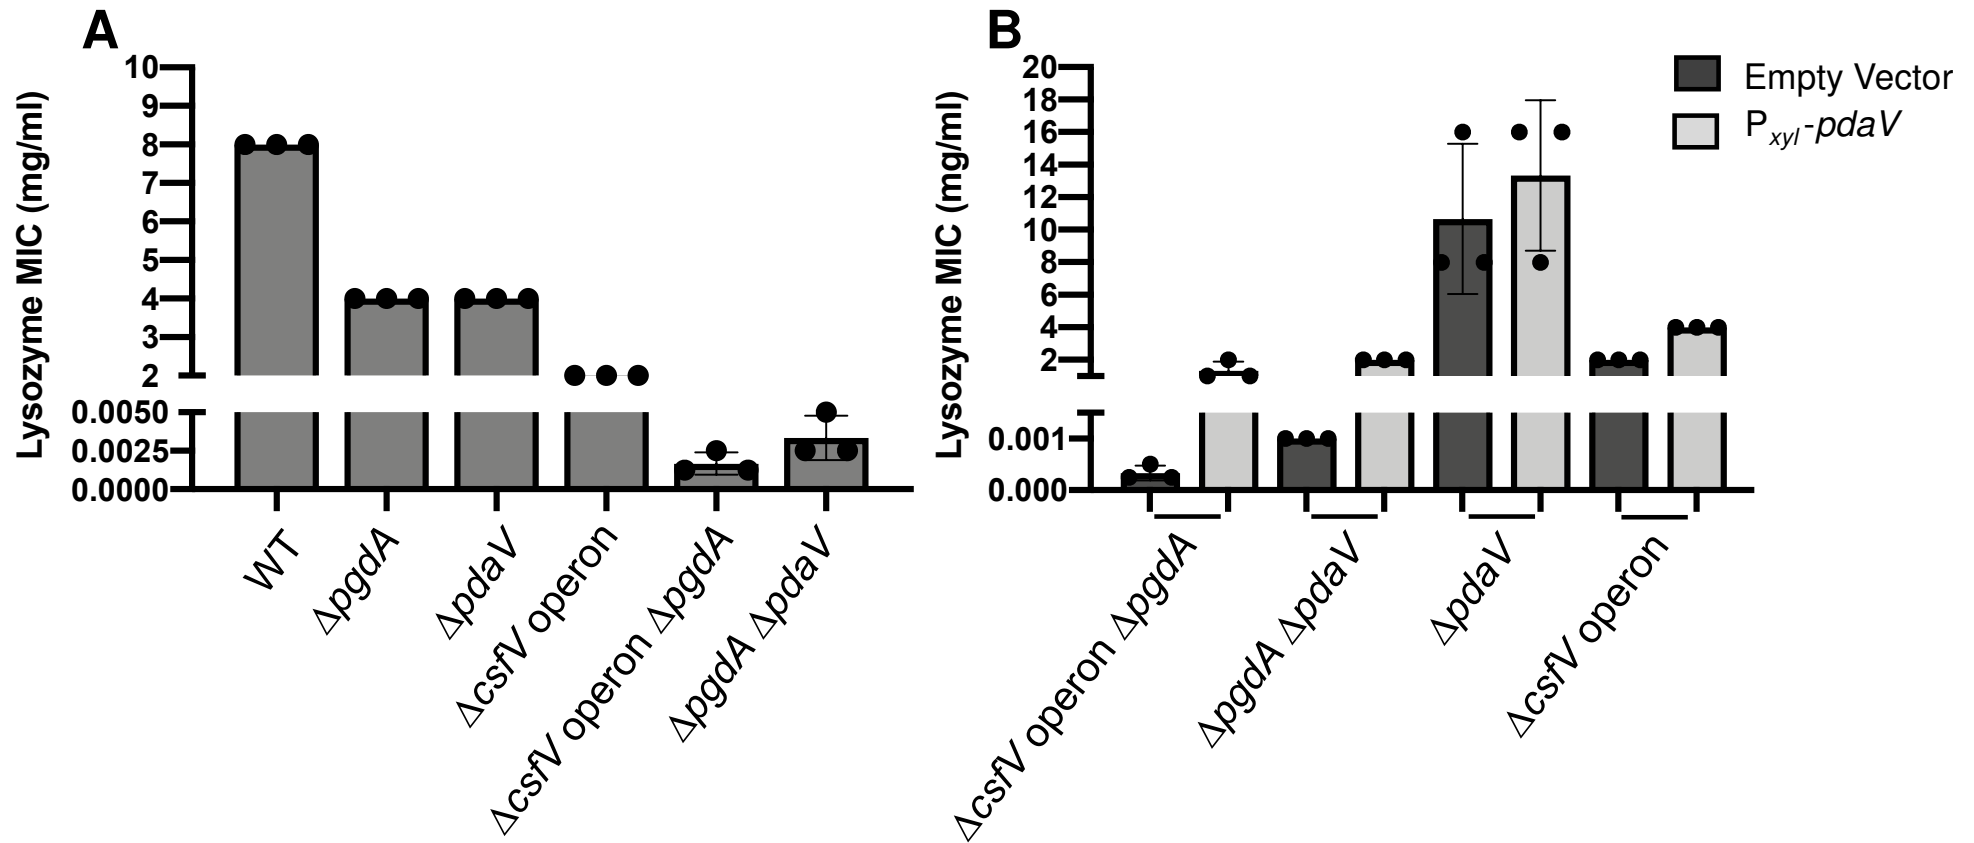

**Figure 3.** A) Overnight cultures were sub-cultured into TY medium and grown to an  $OD_{600} = 0.3$ ; 20  $\mu$ g/ml lysozyme was added and incubated for 5 hrs prior to set up of MIC (WT, R20291;  $\Delta pgdA$ , GMK241;  $\Delta pdaV$ , GMK152;  $\Delta csfV$  operon, GMK157;  $\Delta csfV$  operon  $\Delta pgdA$ , GMK243;  $\Delta pdaV \Delta pgdA$ , GMK301). B) Strains carrying either  $P_{xyl}$ - $pdaV$  (pCE618) or an empty vector (pAP114) were constructed ( $\Delta csfV$  operon  $\Delta pgdA$  pAP114, GMK312;  $\Delta csfV$  operon  $\Delta pgdA$  pCE618, GMK313;  $\Delta pdaV \Delta pgdA$  pAP114, GMK314;  $\Delta pdaV \Delta pgdA$  pCE618, GMK315;  $\Delta pdaV$  pAP114, GMK316;  $\Delta pdaV$  pCE618, GMK317;  $\Delta csfV$  operon pAP114, GMK174;  $\Delta csfV$  operon pCE618, GMK177). Overnight cultures were sub-cultured into TY Thi<sub>10</sub> medium supplemented with 1% xylose. Cultures were grown to an  $OD_{600} = 1.0$  and a lysozyme MIC was set up with 1% xylose.

Figure 4

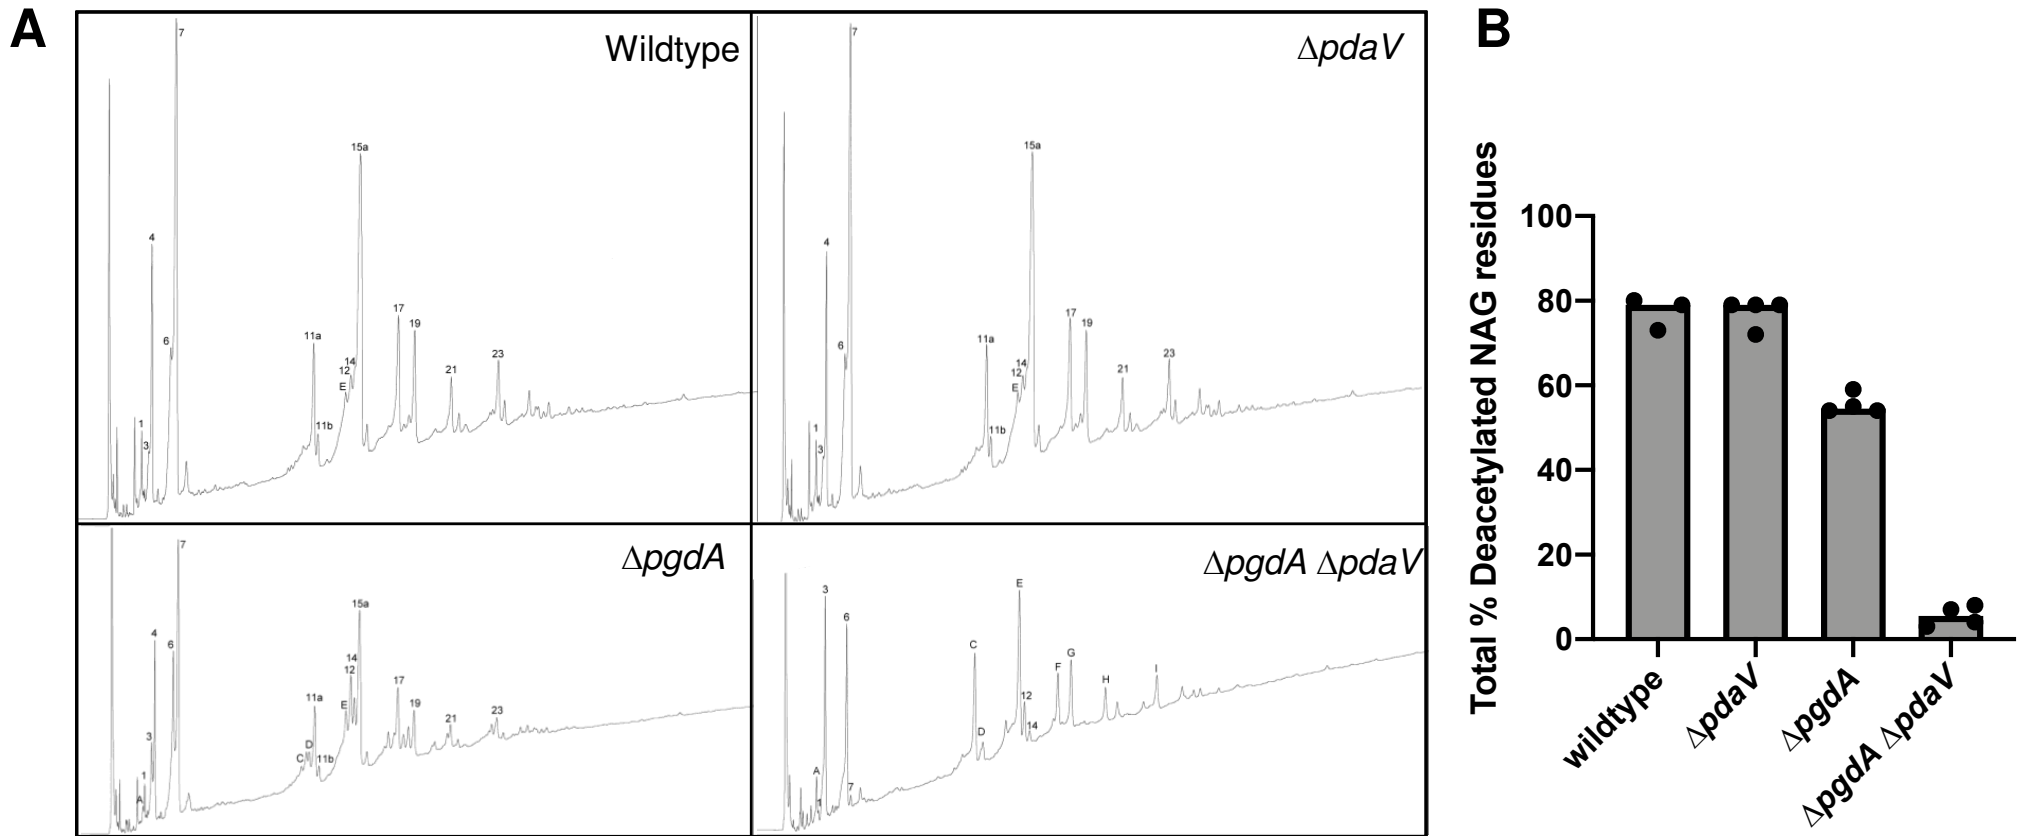

**Figure 4.** Peptidoglycan was purified from cultures grown to mid-log ( $OD_{600} = 0.6-0.8$ ). Peptidoglycan was digested with mutanolysin. Fragments were separated using reversed-phase HPLC and structures determined using mass spectrometry. B) Total percentages of deacetylated residues are shown for strains indicated (WT, R20291;  $\Delta pdaV$ , GMK152;  $\Delta pgdA$ , GMK241;  $\Delta pgdA \Delta pdaV$ , GMK301).

Figure 5

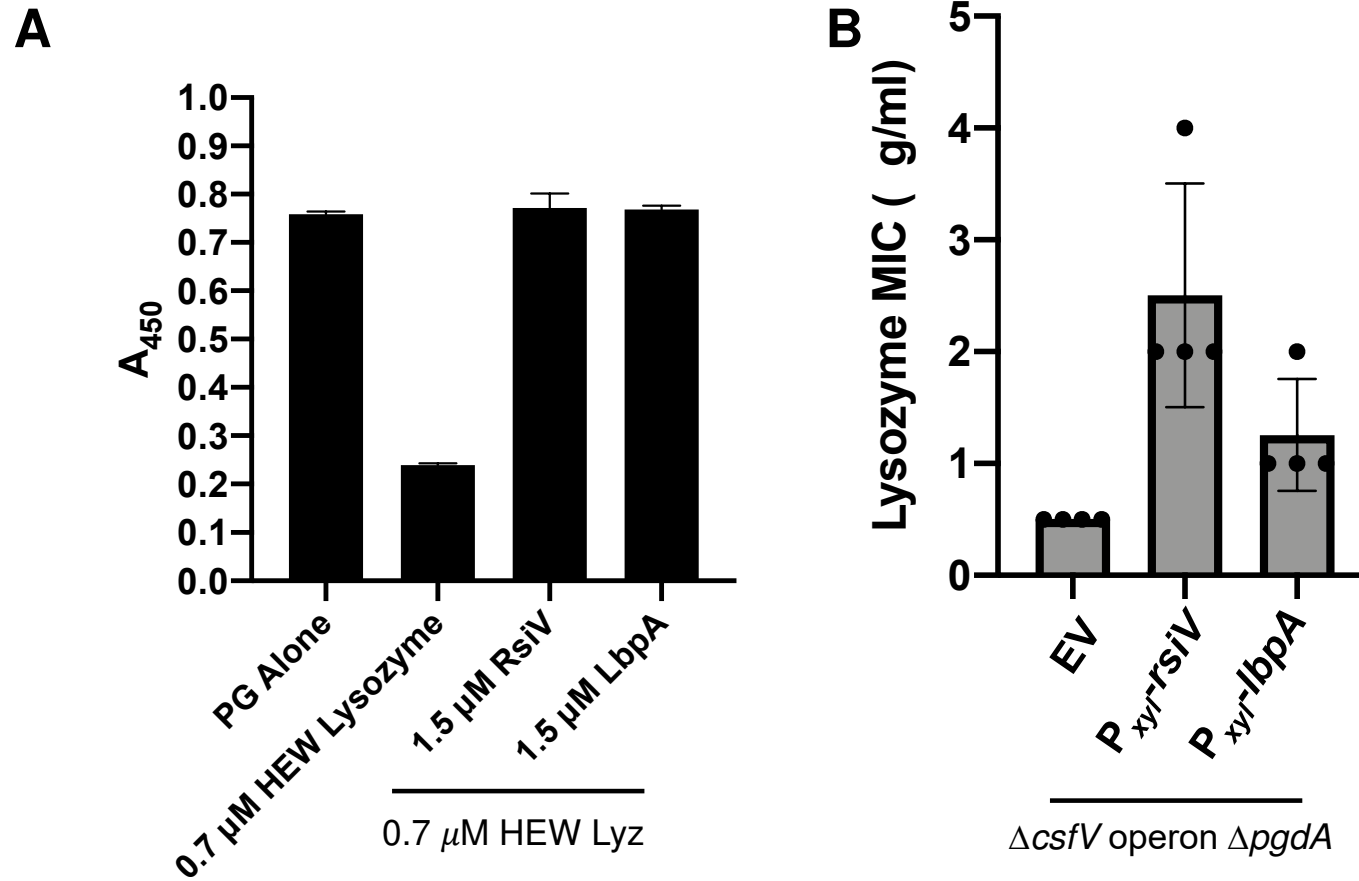

**Figure 5.** A) Peptidoglycan from *M. lysodeikticus* was combined with 10  $\mu$ g/ml lysozyme and purified RsiV or LbpA. The  $A_{450}$  was monitored every minute for 30 minutes to determine degradation of lysozyme. Degradation after 30 minutes is shown. B) Overnight cultures were sub-cultured into TY Thi<sub>10</sub> medium supplemented with 1% xylose and grown to OD<sub>600</sub>= 1.0 and a lysozyme MIC was set up with 1% xylose. A one-way ANOVA showed effect of the inhibitor proteins on lysozyme resistance was significant, F (2,9)= 9.8,  $p$ = 0.0055.
